# Supplementary material for: Cytokines and Venous Leg Ulcer Healing—A Systematic Review
Source: MDPI journal article supplement (doi:10.3390/ijms23126526), 2022-06-10
Supplement: s1 [file s1]

Supplementary Table S4. Overview of results for each study.

| First author<br>year, country | Study<br>design                       | Outcomes                                                                                                                       | Follow-up                        | Specimen    | Analysis                               | Cytokines                                                                                                                                                                             | Main findings                                                                                                                                                                                                                                                                                                                                                                                                                             |
|-------------------------------|---------------------------------------|--------------------------------------------------------------------------------------------------------------------------------|----------------------------------|-------------|----------------------------------------|---------------------------------------------------------------------------------------------------------------------------------------------------------------------------------------|-------------------------------------------------------------------------------------------------------------------------------------------------------------------------------------------------------------------------------------------------------------------------------------------------------------------------------------------------------------------------------------------------------------------------------------------|
| Beidler 2009 [1],<br>USA      | Cohort study                          | a. Rapid vs. delayed<br>healing<br>( <i>&gt;40% vs. &lt;40% area<br/>reduction</i> )<br><br>b. Before vs. after<br>compression | 4 w                              | Biopsy      | Luminex<br>& ELISA<br>(TGF- $\beta$ 1) | G-CSF, GM-CSF, IFN- $\gamma$ , IL-1 $\alpha$ , IL-1 $\beta$ , IL1Ra, IL-2, IL-4, IL-5, IL-6, IL-7, IL-8, IL-10, IL12p40, IL-12p70, IL-13, IL-15, IL-17, TGF- $\beta$ 1, TNF- $\alpha$ | a. $\uparrow$ GM-CSF, IFN- $\gamma$ , IL-1 $\alpha$ , IL-1 $\beta$ , IL12p40, <i>before</i> compression in rapid healing vs. delayed. $\uparrow$ IL-1Ra <i>after</i> compression in rapid healing. b. $\uparrow$ G-CSF, GM-CSF, IFN- $\gamma$ , IL-1 $\alpha$ , IL-1 $\beta$ , IL-6, IL-8, IL12p40, TNF- $\alpha$ before compression vs. after. $\uparrow$ TGF- $\beta$ 1 after compression and trend for $\uparrow$ IL-10 ( $p=0.076$ ). |
| Charles 2008 [2], USA         | Cross-sectional study                 | Healing vs. non-healing                                                                                                        | NA                               | Biopsy      | High throughout cDNA microarray        | HB-EGF, PDGFR $\alpha$ , S100A7                                                                                                                                                       | $\downarrow$ S100A7 at the edge of non-healing VLU, and HB-EGF in the ulcer bed. $\uparrow$ PDGF receptor in the bed of non-healing.                                                                                                                                                                                                                                                                                                      |
| Drinkwater 2003 [3], UK       | Cohort study                          | Healing vs. non-healing                                                                                                        | At least 1 year, or until healed | WF, biopsy  | ELISA, RT-PCR                          | ELISA: VEGF-165 (WF, biopsy), VEGF-R1 (WF). mRNA biopsy: VEGF-121, VEGF-165, VEGF-189, VEGF-R1, VEGF-R2                                                                               | $\uparrow$ VEGF-165 in WF in non-healing vs. healing, but not in biopsy. Non-healing wounds have a high level of expression of VEGF, at both the gene transcript and protein level. Results for mRNA cannot be reliably extracted                                                                                                                                                                                                         |
| Escandon 2012 [4], USA        | Clinical trial: Ultrasound            | Correlation between change in cytokine level and healing (wound area change)                                                   | 4 w                              | Biopsy      | RT-PCR                                 | IL-1 $\alpha$ , IL-6, IL-8, IL-10, IL-11, TNF- $\alpha$ , VEGF                                                                                                                        | $\downarrow$ IL-1 $\alpha$ and TNF- $\alpha$ with healing ( $p<0.05$ , and a trend for reduction of IL-6 ( $p=0.0508$ ), IL-8 ( $p=0.099$ ), IL-11 ( $p=0.082$ ) and VEGF ( $p=0.066$ ).                                                                                                                                                                                                                                                  |
| Filkor 2016 [5], Hungary      | Cohort study (unclear if prospective) | Responding vs. non-responding ( $\geq 20\%$ vs $<20\%$ area reduction)                                                         | 4 w                              | PBMC        | QRT-PCR                                | IL-1 $\alpha$ , IL-8, IL-10, TNF- $\alpha$ ,                                                                                                                                          | $\uparrow$ IL-1 $\alpha$ and IL-8 in non-responders                                                                                                                                                                                                                                                                                                                                                                                       |
| Fivenson 1997 [6], USA        | Cohort study                          | Correlation to healing                                                                                                         | 8 w                              | WF          | ELISA                                  | IL-8, IL-10 (other cytokines cannot be reliably extracted)                                                                                                                            | $\uparrow$ IL-8 with healing w 8 ( $p=0.09$ ). A dynamic cytokine profile through the healing process. IL-10 increased after w 3 (11 .2% median healing), but was NS compared to baseline.                                                                                                                                                                                                                                                |
| Gohel 2008 [7], UK            | Cohort study                          | Correlation<br>a. Between cytokine change and ulcer size change<br>b. To baseline levels and ulcer size change                 | 5 w                              | WF<br>Serum | Sandwich<br>ELISA                      | FGF-2, IL-1 $\beta$ , TGF- $\beta$ 1 TNF- $\alpha$ , VEGF                                                                                                                             | a. $\uparrow$ TGF- $\beta$ 1 correlated to healing<br>b. $\leftrightarrow$                                                                                                                                                                                                                                                                                                                                                                |
| Grandi 2018 [8], Italy        | Clinical trial: ALA-PDT               | Correlation to wound mean volume reduction                                                                                     | Unclear, around 3 w              | Biopsy      | IHC                                    | TGF- $\beta$ , TNF- $\alpha$ (TNF- $\alpha$ reported for mastcells)                                                                                                                   | $\uparrow$ TGF- $\beta$ correlated to healing                                                                                                                                                                                                                                                                                                                                                                                             |
| Harris 1995 [9], UK           | Cross-sectional                       | Healing vs. non-healing                                                                                                        | NA                               | WF          | ELISA, bioassay                        | FGF-2, GM-CSF, IL-1 $\alpha$ , IL-1 $\alpha$ bio,                                                                                                                                     | $\leftrightarrow$                                                                                                                                                                                                                                                                                                                                                                                                                         |

## Cytokines and Venous Leg Ulcer Healing – A Systematic Review

| study                     |                                         | IL-1 $\beta$ bio, IL-6 bio, PDGF-AB,                                                                                            |                  |                        |                               |                                                                                                                                                                                                                                                                                                         |                                                                                                                                                                                                                       |
|---------------------------|-----------------------------------------|---------------------------------------------------------------------------------------------------------------------------------|------------------|------------------------|-------------------------------|---------------------------------------------------------------------------------------------------------------------------------------------------------------------------------------------------------------------------------------------------------------------------------------------------------|-----------------------------------------------------------------------------------------------------------------------------------------------------------------------------------------------------------------------|
| He 1997 [10], UK          | Experimental study (reperfusion injury) | Correlation to healing                                                                                                          | 3 h 20 min       | Serum from leg and arm | Sandwich enzyme immunoassay   | IL-1 $\beta$ , IL-1RA, IL-6, TNF- $\alpha$                                                                                                                                                                                                                                                              | $\leftrightarrow$                                                                                                                                                                                                     |
| Hodde 2020 [11], USA      | Clinical trial: SIS wound matrix        | Healed vs. non-healed: w 12                                                                                                     | Up to 12 w       | WF                     | Luminex ELISA: TGF- $\beta$ 1 | GM-CSF, IFN- $\gamma$ , IL-1 $\beta$ , IL-2, IL-4, IL-5, IL-8, IL-10, IL-12(p70), IL-13, TGF- $\beta$ 1, TNF- $\alpha$                                                                                                                                                                                  | $\downarrow$ IL-8 and TNF- $\alpha$ from baseline in healed. IL-1 $\beta$ showed a trend towards reduction in healed but increase in non-healed.<br>$\uparrow$ TGF- $\beta$ 1 from baseline in healed vs. non-healed. |
| Krejner 2017 [12], Poland | Retrospective cohort study              | Healing per week. Poor: <5%, Moderate: 5-10%, Good: 11-15%, Fast: >15%                                                          | -4w              | Serum                  | ELISA                         | IL-6, IL-8, TNF                                                                                                                                                                                                                                                                                         | $\leftrightarrow$                                                                                                                                                                                                     |
| Lagattolla 1995 [13], UK  | Cohort study*                           | a. Healed vs. non-healed<br>b. Correlation to time to healing                                                                   | 6 mo             | Biopsy                 | ELISA                         | FGF-2, PDGF-AB, TGF- $\beta$ 1                                                                                                                                                                                                                                                                          | a. $\uparrow$ FGF-2 at the ulcer edge in healed vs. non-healed, but not sign. for ulcer bed.<br>b. Increased TGF- $\beta$ 1 at the wound edge correlated to rapid healing (sign. trend).                              |
| Ligi 2016 [14], Italy     | Cross-sectional and cohort study        | Inflammatory vs. granulating VLU                                                                                                | During admission | WF                     | Luminex                       | FGF-2, G-CSF, GM-CSF, IFN- $\gamma$ , IL-1 $\beta$ , IL-1ra, IL-2, IL-4, IL-5, IL-6, IL-7, IL-8, IL-9, IL-10, IL-12 (p70), IL-13, IL-15, IL-17, PDGF-bb, TNF- $\alpha$ , VEGF                                                                                                                           | $\uparrow$ GM-CSF, IL-1 $\beta$ , IL-12p70, IL-10, IL-8, VEGF in inflammatory vs. granulating VLU.<br>$\uparrow$ PDGF-bb in granulating                                                                               |
| Ligi 2017 [15], Italy     | Cross-sectional study and cohort study* | Inflammatory vs. granulating VLU                                                                                                | NA               | WF                     | Luminex                       | TGF- $\beta$ 1, TGF- $\beta$ 2, TGF- $\beta$ 3                                                                                                                                                                                                                                                          | $\uparrow$ TGF- $\beta$ 3 in inflammatory vs granulating VLU                                                                                                                                                          |
| McQuilling 2021 [16], USA | Clinical trial: Amniotic membrane       | a. Healing vs. non-healing (>85% vs. < 85% closure at 12 w)<br>b. Correlation between cytokine level and percentage area change | 12 w             | WF                     | Multiplex MAP arrays          | EGF, FGF-2, G-CSF, GM-CSF, IFN- $\gamma$ , IL-1 $\alpha$ , IL-1 $\beta$ , IL-1ra, IL-2, IL-3, IL-4, IL-5, IL-6, IL-7, IL-8, IL-9, IL-10, IL-12p40, IL-12p70, IL-13, IL-15, IL-17, PDGF-AA, PDGF-BB, TNF- $\alpha$ , TNF- $\beta$ , TGF- $\alpha$ , TGF-1 $\beta$ , TGF- $\beta$ 2, TGF- $\beta$ 3, VEGF | a. $\uparrow$ IL-1ra, IL-1 $\alpha$ , IL-2, IL-3, IL-9, TNF- $\beta$ in non-healing, evaluated at all time-points.<br>b. $\downarrow$ IL-1ra, IL-7 and IL-8, and $\uparrow$ EGF correlated to size reduction.         |
| Murphy 2002 [17], Ireland | Cohort study                            | Healing vs. non-healing (before & after compression)                                                                            | 12 w             | Serum, from ulcer leg  | ELISA                         | TNF- $\alpha$ , VEGF                                                                                                                                                                                                                                                                                    | $\uparrow$ VEGF and TNF- $\alpha$ in non-healing. Reduction in the levels to below control values with compression, correlating with healing.                                                                         |
| Mwaura 2006 [18], Ireland | Cohort study                            | Healing vs. non-healing:                                                                                                        | 8 w              | WF, biopsy             | ELISA, IHC                    | PDGF-AA                                                                                                                                                                                                                                                                                                 | $\uparrow$ PDGF-AA in WF and biopsy of healing VLU. PDGF-AA                                                                                                                                                           |

## Cytokines and Venous Leg Ulcer Healing – A Systematic Review

|                                |                                                     | <20% vs. >20% decrease in<br>ulcer area                                                           |                    |            |                                                    |                                                                                                                                                                                                                                                                  | activity is associated with ulcer healing.                                                                                                                                                                                                                                                                                                                                                            |
|--------------------------------|-----------------------------------------------------|---------------------------------------------------------------------------------------------------|--------------------|------------|----------------------------------------------------|------------------------------------------------------------------------------------------------------------------------------------------------------------------------------------------------------------------------------------------------------------------|-------------------------------------------------------------------------------------------------------------------------------------------------------------------------------------------------------------------------------------------------------------------------------------------------------------------------------------------------------------------------------------------------------|
| Pukstad 2010 [19], UK          | Cohort study                                        | Healing vs. non-healing                                                                           | 8 w,<br>or healing | WF         | Antibody glass<br>array, TNF- $\alpha$<br>bioassay | 40 cytokines analyzed. Results<br>presented on IL-1 $\alpha$ , IL-1 $\beta$ , IL-6R,<br>IL-8, sTNFR-I, sTNFR-II, TNF- $\alpha$<br>from monocytes                                                                                                                 | No test of significance. Healing associated with reduction in<br>IL-1 $\alpha$ and IL-1 $\beta$ . Increased IL-8 was seen in healing wounds,<br>suggesting that increasing levels of IL-8 in chronic wound<br>fluids is associated with healing. In non-healing wounds IL-8<br>decreased with time.                                                                                                   |
| Sadler 2012 [20], Australia    | Clinical trial: High<br>vs. low dose<br>doxycycline | Association between<br>cytokine level w 4 and<br>percentage reduction in<br>ulcer area            | 4 w                | WF         | ELISA                                              | TNF- $\alpha$                                                                                                                                                                                                                                                    | $\leftrightarrow$                                                                                                                                                                                                                                                                                                                                                                                     |
| Senet 2003 [21],<br>France     | RCT: Platelets vs.<br>placebo                       | Healing vs. non-healing                                                                           | 16 w               | WF         | ELISA                                              | IL-8, KGF, VEGF                                                                                                                                                                                                                                                  | $\uparrow$ IL-8 in non-healing at the end of the study, but not at the<br>beginning. Healing is associated with a decrease in IL-8.                                                                                                                                                                                                                                                                   |
| Serra 2013 [22],<br>Italy      | RCT:<br>Minocycline vs.<br>control                  | High-healing vs. slow-<br>healing ( $\geq 1$<br>vs. $< 1$ cm <sup>2</sup> /w)                     | Median:<br>13 mo   | WF, plasm: | ELISA                                              | VEGF                                                                                                                                                                                                                                                             | $\uparrow$ VEGF in slow-healing ulcers, in plasma and WF for patients<br>receiving minocycline. Unclear if this only refers to the<br>experimental arm or also the control.                                                                                                                                                                                                                           |
| Serra 2015 [23],<br>Italy      | RCT:<br>Doxycycline vs.<br>control                  | High-healing vs. slow-<br>healing ( $\geq 1$<br>vs. $< 1$ cm <sup>2</sup> /w)                     | Median:<br>13 mo   | WF, plasm: | ELISA                                              | VEGF                                                                                                                                                                                                                                                             | $\uparrow$ VEGF in slow-healing ulcers in plasma and WF for pt<br>receiving doxycycline. Unclear if this only refers to the<br>experimental arm or also the control.                                                                                                                                                                                                                                  |
| Stacey 2019 [24],<br>Australia | Cohort study                                        | Healing vs. non-healing<br>(Area change over 3 w to<br>determine the healing status<br>each week) | Up to 13 w         | WF         | Multiplex ELISA                                    | G-CSF, GM-CSF, IFN- $\gamma$ ("TFN-g"),<br>IL-1 $\alpha$ , IL-1 $\beta$ , IL-1Ra, IL-2, IL-4, IL-<br>5, IL-6, IL-7, IL-8, IL-10, IL-11, IL-<br>12p40, IL-12p70, IL-13, IL-15, IL-16,<br>IL-17, M-CSF, PDGF-BB, TNF- $\alpha$ ,<br>TNF- $\beta$ , TNF-RI, TNF-RII | $\uparrow$ GM-CSF and IL-16, and $\downarrow$ IL-6 and PDGF-BB, in non-<br>healing by univariable analysis. Multivariable logistic<br>regression: $\uparrow$ GM-CSF only remaining significant, OR 126.5,<br>ROC: 0.92. GM-CSF is a predictive biomarker of nonhealing,<br>and have cutoffs which can be used to differentiate between<br>healing and non-healing VLU. Predictive factor for healing. |
| Tian 2003 [25],<br>Australia   | Cohort study                                        | Healing vs. non-healing                                                                           | 2 w                | Biopsy     | IHC                                                | EGF, FGF-2, IL-1 $\alpha$ , IL-6, PDGF-A,<br>TGF- $\beta$ 1, TNF- $\alpha$ , TNF-RI, VEGF                                                                                                                                                                        | $\uparrow$ All cytokines in keratinocytes in the adjacent intact skin in<br>non-healing. $\uparrow$ VEGF and PDGF-A in keratinocytes at the<br>ulcer edge in non-healing, but not for other cytokines.                                                                                                                                                                                                |
| Trengove 2000 [26], Australia  | Cohort study                                        | a. Healing vs. non-healing<br>b. Ulcer size change                                                | 2 w                | WF         | ELISA &<br>bioassay                                | EGF, FGF-2, IL-1 $\alpha$ , IL-1 $\beta$ , IL-1 bio,<br>IL-6, IL-6 bio, PDGF, TNF- $\alpha$ , TGF-<br>$\beta$ 1                                                                                                                                                  | a. $\uparrow$ IL-1 $\alpha$ , IL-1 $\beta$ , IL-1 bio, IL-6 bio and TNF- $\alpha$ in non-healing.<br>b. $\leftrightarrow$ No relationship between change in ulcer size and cytokine<br>levels                                                                                                                                                                                                         |

## Cytokines and Venous Leg Ulcer Healing – A Systematic Review

|                                 |                                   |                                                                                                                      |     |              |                               |                                                                                      |                                                                                                                                                                                                                                                                                                                                                                                                                                                                                                  |
|---------------------------------|-----------------------------------|----------------------------------------------------------------------------------------------------------------------|-----|--------------|-------------------------------|--------------------------------------------------------------------------------------|--------------------------------------------------------------------------------------------------------------------------------------------------------------------------------------------------------------------------------------------------------------------------------------------------------------------------------------------------------------------------------------------------------------------------------------------------------------------------------------------------|
| Wallace 1998<br>[27], Australia | Cohort study                      | Healing vs. non-healing                                                                                              | 2 w | WF           | ELISA &<br>bioassay           | TNF- $\alpha$ , TNF- $\alpha$ bio, sTNF- $\alpha$ -R p75,<br>sTNF- $\alpha$ -R p55   | ↑ TNF- $\alpha$ and sTNF- $\alpha$ -R p75 in non-healing                                                                                                                                                                                                                                                                                                                                                                                                                                         |
| Wiegand 2017<br>[28], USA       | RCT:<br>Ultrasound vs.<br>control | Correlation to<br>a. Wound size reduction<br>b. Responder vs.<br>non-responder (>40% vs.<br>≤40% area reduction w 4) | 4 w | WF<br>Biopsy | Luminex<br>TGF- $\beta$ : IHC | IL-1 $\beta$ , IL-6, IL-8, IL-10, TNF- $\alpha$ ,<br>TGF- $\beta$ (the last, biopsy) | a. ↓ IL-6 correlated to percentage wound reduction (prediction of healing). IL-8 showed a similar trend. In contrast, increases of TNF- $\alpha$ and IL-1 $\beta$ was linked to higher percentage area reduction (significance unclear).<br>b. Data challenging to extract, test of significance unclear. Cytokine levels appears different between the treatment groups, and changes with time during w 2 and w 4, e.g. IL-8 declined in responders, but increased in non-responders over time. |

↑ Increased, ↓ decreased, ↔ no difference, \*assumed. Abbreviations: ALA-PDT = Aminolevulinic acid photodynamic therapy; cDNA = Complementary DNA; CFU = Colony forming unit(s); ELISA = Enzyme-linked immuno sorbent assay; FAP = Frozen allogenic plasma; IHC = Immunohistochemistry; Luminex = Multiplex Assay; Mo = Months; NA = Not applicable; NLFU = Noncontact low-frequency ultrasound; NR = Not reported; PBMC = Peripheral blood mononuclear cells; Pt = Patients; QRT-PCR = Quantitative reverse transcriptase polymerase chain reaction; RT-PCR = Reverse transcriptase polymerase chain reaction; VAS = Visual analogue scale; VLU = Venous leg ulcer(s), WF = Wound fluid

## References

1. Beidler, S.K.; Douillet, C.D.; Berndt, D.F.; Keagy, B.A.; Rich, P.B.; Marston, W.A. Inflammatory cytokine levels in chronic venous insufficiency ulcer tissue before and after compression therapy. *J Vasc Surg* **2009**, *49*, 1013-1020, doi:10.1016/j.jvs.2008.11.049.
2. Charles, C.A.; Tomic-Canic, M.; Vincek, V.; Nassiri, M.; Stojadinovic, O.; Eaglstein, W.H.; Kirsner, R.S. A gene signature of nonhealing venous ulcers: potential diagnostic markers. *J Am Acad Dermatol* **2008**, *59*, 758-771, doi:10.1016/j.jaad.2008.07.018.
3. Drinkwater, S.L.; Burnand, K.G.; Ding, R.; Smith, A. Increased but ineffectual angiogenic drive in nonhealing venous leg ulcers. *J Vasc Surg* **2003**, *38*, 1106-1112, doi:10.1016/s0741-5214(03)01053-x.
4. Escandon, J.; Vivas, A.C.; Perez, R.; Kirsner, R.; Davis, S. A prospective pilot study of ultrasound therapy effectiveness in refractory venous leg ulcers. *Int Wound J* **2012**, *9*, 570-578, doi:10.1111/j.1742-481X.2011.00921.x.
5. Filkor, K.; Németh, T.; Nagy, I.; Kondorosi, É.; Urbán, E.; Kemény, L.; Szolnoky, G. The expression of inflammatory cytokines, TAM tyrosine kinase receptors and their ligands is upregulated in venous leg ulcer patients: a novel insight into chronic wound immunity. *Int Wound J* **2016**, *13*, 554-562, doi:10.1111/iw.12473.
6. Fivenson, D.P.; Faria, D.T.; Nickoloff, B.J.; Poverini, P.J.; Kunkel, S.; Burdick, M.; Strieter, R.M. Chemokine and inflammatory cytokine changes during chronic wound healing. *Wound Repair Regen* **1997**, *5*, 310-322, doi:10.1046/j.1524-475X.1997.50405.x.
7. Gohel, M.S.; Windhaber, R.A.; Tarlton, J.F.; Whyman, M.R.; Poskitt, K.R. The relationship between cytokine concentrations and wound healing in chronic venous ulceration. *J Vasc Surg* **2008**, *48*, 1272-1277, doi:10.1016/j.jvs.2008.06.042.

8. Grandi, V.; Bacci, S.; Corsi, A.; Sessa, M.; Puliti, E.; Murciano, N.; Scavone, F.; Cappugi, P.; Pimpinelli, N. ALA-PDT exerts beneficial effects on chronic venous ulcers by inducing changes in inflammatory microenvironment, especially through increased TGF-beta release: A pilot clinical and translational study. *Photodiagnosis Photodyn Ther* **2018**, *21*, 252-256, doi:10.1016/j.pdpdt.2017.12.012.
9. Harris, I.R.; Yee, K.C.; Walters, C.E.; Cunliffe, W.J.; Kearney, J.N.; Wood, E.J.; Ingham, E. Cytokine and protease levels in healing and non-healing chronic venous leg ulcers. *Exp Dermatol* **1995**, *4*, 342-349.
10. He, C.F.; Cherry, G.W.; Arnold, F. Postural vasoregulation and mediators of reperfusion injury in venous ulceration. *J Vasc Surg* **1997**, *25*, 647-653, doi:10.1016/s0741-5214(97)70290-8.
11. Hodde, J.P.; Hiles, M.C.; Metzger, D.W. Characterization of the local wound environment following treatment of chronic leg ulcers with SIS wound matrix. *J Tissue Viability* **2020**, *29*, 42-47, doi:10.1016/j.jtv.2019.12.003.
12. Krejner, A.; Litwiniuk, M.; Grzela, T. LL-37 but Not 25-Hydroxy-Vitamin D Serum Level Correlates with Healing of Venous Leg Ulcers. *Arch Immunol Ther Exp (Warsz)* **2017**, *65*, 455-461, doi:10.1007/s00005-016-0423-9.
13. Lagattolla, N.R.; Stacey, M.C.; Burnand, K.G.; Gaffney, P.G. Growth factors, tissue and urokinase-type plasminogen activators in venous ulcers. *Ann Cardiol Angeiol (Paris)* **1995**, *44*, 299-303.
14. Ligi, D.; Mosti, G.; Croce, L.; Raffetto, J.D.; Mannello, F. Chronic venous disease - Part I: Inflammatory biomarkers in wound healing. *Biochim Biophys Acta* **2016**, *1862*, 1964-1974, doi:10.1016/j.bbadis.2016.07.018.
15. Ligi, D.; Croce, L.; Mosti, G.; Raffetto, J.D.; Mannello, F. Chronic Venous Insufficiency: Transforming Growth Factor- $\beta$  Isoforms and Soluble Endoglin Concentration in Different States of Wound Healing. *Int J Mol Sci* **2017**, *18*, doi:10.3390/ijms18102206.
16. McQuilling, J.P.; Carter, M.J.; Fulton, J.A.; Patel, K.; Doner, B.; Serena, T.E.; Mowry, K.C. A prospective clinical trial evaluating changes in the wound microenvironment in patients with chronic venous leg ulcers treated with a hypothermically stored amniotic membrane. *Int Wound J* **2021**, *19*, doi:10.1111/iwj.13606.
17. Murphy, M.A.; Joyce, W.P.; Condron, C.; Bouchier-Hayes, D. A reduction in serum cytokine levels parallels healing of venous ulcers in patients undergoing compression therapy. *Eur J Vasc Endovasc Surg* **2002**, *23*, 349-352, doi:10.1053/ejvs.2002.1597.
18. Mwaura, B.; Mahendran, B.; Hynes, N.; Defreitas, D.; Avalos, G.; Adegbola, T.; Adham, M.; Connolly, C.E.; Sultan, S. The impact of differential expression of extracellular matrix metalloproteinase inducer, matrix metalloproteinase-2, tissue inhibitor of matrix metalloproteinase-2 and PDGF-AA on the chronicity of venous leg ulcers. *Eur J Vasc Endovasc Surg* **2006**, *31*, 306-310, doi:10.1016/j.ejvs.2005.08.007.
19. Pukstad, B.S.; Ryan, L.; Flo, T.H.; Stenvik, J.; Moseley, R.; Harding, K.; Thomas, D.W.; Espevik, T. Non-healing is associated with persistent stimulation of the innate immune response in chronic venous leg ulcers. *J Dermatol Sci* **2010**, *59*, 115-122, doi:10.1016/j.jdermsci.2010.05.003.
20. Sadler, G.M.; Wallace, H.J.; Stacey, M.C. Oral doxycycline for the treatment of chronic leg ulceration. *Archives of dermatological research* **2012**, *304*, 487-493, doi:10.1007/s00403-011-1201-5.
21. Senet, P.; Bon, F.X.; Benbunan, M.; Bussel, A.; Traineau, R.; Calvo, F.; Dubertret, L.; Dosquet, C. Randomized trial and local biological effect of autologous platelets used as adjuvant therapy for chronic venous leg ulcers. *J Vasc Surg* **2003**, *38*, 1342-1348, doi:10.1016/s0741-5214(03)00908-x.
22. Serra, R.G., R.; Buffone, G.; Gallelli, L.; De Franciscis, S. The effects of minocycline on extracellular matrix in patients with chronic venous leg ulcers. *Acta Phlebologica* **2013**, *14*, 99-107.
23. Serra, R.; Gallelli, L.; Buffone, G.; Molinari, V.; Stillitano, D.M.; Palmieri, C.; de Franciscis, S. Doxycycline speeds up healing of chronic venous ulcers. *Int Wound J* **2015**, *12*, 179-184, doi:10.1111/iwj.12077.
24. Stacey, M.C.; Phillips, S.A.; Farrokhyar, F.; Swaine, J.M. Evaluation of wound fluid biomarkers to determine healing in adults with venous leg ulcers: A prospective study. *Wound Repair Regen* **2019**, *27*, 509-518, doi:10.1111/wrr.12723.

25. Tian, Y.W.; Stacey, M.C. Cytokines and growth factors in keratinocytes and sweat glands in chronic venous leg ulcers. An immunohistochemical study. *Wound Repair Regen* **2003**, *11*, 316-325, doi:10.1046/j.1524-475x.2003.11502.x.
26. Trengove, N.J.; Bielefeldt-Ohmann, H.; Stacey, M.C. Mitogenic activity and cytokine levels in non-healing and healing chronic leg ulcers. *Wound Repair Regen* **2000**, *8*, 13-25.
27. Wallace, H.J.; Stacey, M.C. Levels of tumor necrosis factor-alpha (TNF-alpha) and soluble TNF receptors in chronic venous leg ulcers--correlations to healing status. *J Invest Dermatol* **1998**, *110*, 292-296, doi:10.1046/j.1523-1747.1998.00113.x.
28. Wiegand, C.; Bittenger, K.; Galiano, R.D.; Driver, V.R.; Gibbons, G.W. Does noncontact low-frequency ultrasound therapy contribute to wound healing at the molecular level? *Wound Repair Regen* **2017**, *25*, 871-882, doi:10.1111/wrr.12595.
