# Supplementary material for: Cytokines and Venous Leg Ulcer Healing—A Systematic Review
Source: MDPI journal article supplement (doi:10.3390/ijms23126526), 2022-06-10
Supplement: s1 [file s1]

Cytokines and Venous Leg Ulcer Healing – A Systematic Review

| Supplementary Table S2. Patient characteristics and methodology |        |      |                     |                      |                  |     |                                                   |                                                                       |                                               |                                                                          |                  |                       |                                           |                       |                     |                                 |                 |                                                                                                  |                                                                                                                                                             |
|-----------------------------------------------------------------|--------|------|---------------------|----------------------|------------------|-----|---------------------------------------------------|-----------------------------------------------------------------------|-----------------------------------------------|--------------------------------------------------------------------------|------------------|-----------------------|-------------------------------------------|-----------------------|---------------------|---------------------------------|-----------------|--------------------------------------------------------------------------------------------------|-------------------------------------------------------------------------------------------------------------------------------------------------------------|
| First author<br>and year                                        | Female | Age  | Wound<br>size (cm²) | Wound<br>age<br>(mo) | ABPI             | DM  | Infection                                         | Auto-<br>immunity                                                     | Immuno-<br>suppression                        | Baseline<br>differences                                                  | Sample           | Sampling<br>time      | Analysis                                  | Protease<br>inhibitor | Sterile<br>filtered | Centrifuge<br>prior<br>freezing | Storage<br>(°C) | Disease status at<br>inclusion                                                                   | Treatment before // during study                                                                                                                            |
| Beidler 2009<br>[1]                                             | 69%    | 57.9 | 21.5                | NR<br><6             | ≥0.7<br>1pt <0.9 | Yes | No<br>systemic<br>infection                       | No severe<br>Immune-<br>compromised<br>state/history of<br>vasculitis | No severe<br>Immune-<br>compromise<br>d state | NR                                                                       | Biopsy           | 0h                    | Luminex<br>ELISA (TGF-<br>β1)             | NR                    | NR                  | No                              | -80             | Ulcer age ≤ 6mo, and no<br>prior compression                                                     | NR, but no compression with high-strenght<br>compression before inclusion//Debridement,<br>polyurethane foam dressing, 3- or 4-layer<br>compression weekly  |
| Charles 2008<br>[2]                                             | NR     | NR   | NR                  | NR<br>>1             | ≥0.9             | NR  | NR                                                | NR                                                                    | NR                                            | NR                                                                       | Biopsy           | 0h                    | High<br>throughout<br>cDNA<br>microarray  | NA                    | NA                  | NA                              | NR              | Chronic VLU, >4 w                                                                                | NR // NR                                                                                                                                                    |
| Drinkwater<br>2003 [3]                                          | NR     | NR   | NR                  | NR                   | >0.8             | NR  | NR                                                | NR                                                                    | NR                                            | NR                                                                       | WF and<br>Biopsy | 4h                    | ELISA.<br>RT-PCR for<br>mRNA on<br>biopsy | NR                    | NR                  | Yes                             | -80             | NR                                                                                               | "Various treatments before recruitment" //3-<br>or 4-layer compression                                                                                      |
| Escandon<br>2012 [4]                                            | NR     | NR   | 38.3                | NR<br>≥6             | >0.7             | NR  | No topical<br>AB                                  | NR                                                                    | NR                                            | NR, likely paired data                                                   | Biopsy           | 0h                    | RT-PCR                                    | NR                    | NR                  | NA                              | NR              | Refractory VLU, ≥6 mo<br>and failure to improve in<br>30 days with multi-<br>layered compression | NR // Treatment 3 times/w for 4 w.<br>Ultrasound, foam dressing, 4-layer elastic<br>compression.                                                            |
| Filkor 2016 [5]                                                 | 48%    | 66.7 | 23.2                | NR                   | ≥0.8             | No  | No                                                | No                                                                    | No                                            | NR                                                                       | PBMC             | 0h                    | QRT-PCR                                   | NR                    | NR                  | NR                              | NR              | NR                                                                                               | NR // NR                                                                                                                                                    |
| Fivenson 1997<br>[6]                                            | NR     | NR   | 26.5                | NR                   | >0.65            | NR  | Course of<br>antibiotics<br>given at<br>inclusion | NR                                                                    | NR                                            | NR                                                                       | WF               | 1 w                   | ELISA                                     | NR                    | Yes                 | Yes                             | -70             | Chronic VLU                                                                                      | NR // A 2-w course of antibiotics given<br>before baseline. Nonadherent dressing,<br>hydrofoam pad. Compression bandage of<br>zink-oxide-impregnated gauze. |
| Gohel 2008 [7]                                                  | 46%    | 74   | 4.7                 | 3                    | ≥0.85            | Yes | No                                                | NR                                                                    | NR                                            | Older patients had sign.<br>lowest increases in serum<br>VEGF, 0 to 5 w. | WF and<br>Serum  | WF: 1.5h<br>Serum: 0h | Sandwich<br>ELISA                         | NR                    | NR                  | Yes                             | -80             | Chronic VLU, wound age<br>range 1-180 mo                                                         | Multilayer compression assumed //<br>Nonadhesive dressings 4-layer compression<br>applied by trained staff                                                  |
| Grandi 2018<br>[8]                                              | NR     | NR   | 3459 mm³            | NR                   | NR               | NR  | NR                                                | NR                                                                    | NR                                            | NR, but paired data                                                      | Biopsy           | 0h                    | IHC                                       | NA                    | NA                  | NA                              | NR              | Chronic VLU                                                                                      | NR // ALA-PDT + SOC. Repeated weekly up<br>to three times.                                                                                                  |
| Harris 1995<br>[9]                                              | NR     | 72.7 | 31.2                | 167.4                | NR               | NR  | No (incl.<br>CFU <10⁵                             | NR                                                                    | NR                                            | Age, size or duration not<br>sign. different                             | WF               | 4-6h                  | ELISA and<br>bioassay                     | No                    | Yes                 | Yes                             | -70             | Healing or nonhealing.<br>All VLU ≥6 mo                                                          | NR // NA                                                                                                                                                    |

Cytokines and Venous Leg Ulcer Healing – A Systematic Review

|                        |                                  |             |              |                  |                           |     |                                                                |                                                          |    |                                                                                                                                                                                                    |        |                                 |                                   |    |    |                        |     |                                                                                                                                                                          |                                                                                                                                                                            |
|------------------------|----------------------------------|-------------|--------------|------------------|---------------------------|-----|----------------------------------------------------------------|----------------------------------------------------------|----|----------------------------------------------------------------------------------------------------------------------------------------------------------------------------------------------------|--------|---------------------------------|-----------------------------------|----|----|------------------------|-----|--------------------------------------------------------------------------------------------------------------------------------------------------------------------------|----------------------------------------------------------------------------------------------------------------------------------------------------------------------------|
| microbes/g<br>tissue   |                                  |             |              |                  |                           |     |                                                                |                                                          |    |                                                                                                                                                                                                    |        |                                 |                                   |    |    |                        |     |                                                                                                                                                                          |                                                                                                                                                                            |
| He 1997 [10]           | NR                               | 67.8        | 16.1         | 7 mo-30<br>years | >0.9                      | No  | NR                                                             | No RA                                                    | NR | NR                                                                                                                                                                                                 | Serum  | 0h                              | Sandwich<br>enzyme<br>immunoassay | NR | NR | Yes                    | -20 | NR, duration 7 mo-30<br>years                                                                                                                                            | NR // NA                                                                                                                                                                   |
| Hodde 2020<br>[11]     | NR                               | NR<br>(>18) | NR<br>(1-64) | NR<br>>1         | ≥0.8                      | Yes | No<br>cellulitis,<br>osteo-<br>myelitis,<br>wound<br>infection | No RA,<br>vasculitis or<br>connective<br>tissue disorder | No | NR                                                                                                                                                                                                 | WF     | 1 w                             | Luminex<br>ELISA: TGF-<br>β1      | NR | NR | No, dressing<br>frozen | -80 | Chronic VLU, >1 mo and<br>with granulation tissue.<br>Run-in period did not<br>allow for a more than 50%<br>reduction in wound area<br>over 2 w of SOC +<br>compression. | SOC and compression // Weekly treatment<br>with SIS wound matrix, debridement, gauze,<br>foam occlusive dressing, 4-layer<br>compression.                                  |
| Krejner 2017<br>[12]   | 63%                              | 68.6        | 59.6         | NR<br>≥2-24      | ≥0.8<br>and<br>≤1.1       | NR  | No wound<br>infection<br>within 4 w                            | NR                                                       | NR | NR                                                                                                                                                                                                 | Serum  | 0h                              | ELISA                             | NR | NR | NR                     | NR  | Chronic VLU, ≥2-24 mo<br>duration                                                                                                                                        | NR // Hydrofiber foam composite dressing<br>and multilayer compression. Wound<br>management according to TIME and<br>recommendations of multidisciplinary<br>expert group. |
| Lagatolla 1995<br>[13] | NR                               | NR          | NR           | NR               | NR                        | NR  | NR                                                             | NR                                                       | NR | NR                                                                                                                                                                                                 | Biopsy | NA                              | ELISA                             | NR | NR | NR                     | NR  | NR                                                                                                                                                                       | NR // NA                                                                                                                                                                   |
| Ligi 2016 [14]         | Inflam.:<br>69%<br>Gran.:<br>44% | 72          | 12.9         | 40               | No<br>arterial<br>disease | Yes | Yes                                                            | No (according<br>to criteria, but<br>2 RA pt incl.)      | No | Sign. difference between<br>groups regarding age,<br>hypertension,<br>hyperlipidaemia, infection<br>and VAS-score. No<br>difference as for sex, other<br>comorbidities, duration or<br>wound size. | WF     | Until<br>saturation<br>of gauze | Luminex                           | No | NR | Yes                    | -80 | Chronic non-healing VLU.<br>Mean duration 40 mo.<br>Scheduled for skin<br>grafting.                                                                                      | NR // Surgical debridement<br>and skin grafting                                                                                                                            |
| Ligi 2017 [15]         | 67%                              | 73.7        | 10.7         | 41.6             | No<br>arterial<br>disease | Yes | Yes                                                            | No (but 2 pt<br>with RA<br>included)                     | No | No sign. difference between<br>groups regarding age, sex,<br>comorbidities, ulcer<br>duration, surface area.<br>However, inflam. wounds<br>had sign. higher rate of<br>infection, VAS scores and   | WF     | Until<br>saturation<br>of gauze | Luminex                           | No | NR | Yes                    | -80 | Chronic non-healing VLU,<br>mean wound duration<br>41.6 mo. Scheduled for<br>skin grafting.                                                                              | NR // Inelastic multilayer<br>compression. Skin grafting or foam<br>sclerotherapy was performed after WF<br>sampling.                                                      |

Cytokines and Venous Leg Ulcer Healing – A Systematic Review

| frequency of hyperlipidemia. |      |                            |                               |                            |              |     |                                 |                                         |                                                                 |                                                                                            |               |      |                                                |    |    |                          |     |                                                                                                                                        |                                                                                                                                                                                                                                                                                                                                      |
|------------------------------|------|----------------------------|-------------------------------|----------------------------|--------------|-----|---------------------------------|-----------------------------------------|-----------------------------------------------------------------|--------------------------------------------------------------------------------------------|---------------|------|------------------------------------------------|----|----|--------------------------|-----|----------------------------------------------------------------------------------------------------------------------------------------|--------------------------------------------------------------------------------------------------------------------------------------------------------------------------------------------------------------------------------------------------------------------------------------------------------------------------------------|
| McQuilling 2021 [16]         | 100% | 62.6                       | 8.6                           | 12.6                       | >0.75 - <1.3 | Yes | No                              | No active autoimmune or immune diseases | No                                                              | Does not appear to be differences in demographic data^ between healing vs nonhealing group | WF            | 0h   | Multiplex MAP arrays                           | NR | NR | No, after freezing       | -80 | Chronic VLU, duration unclear. Inclusion criteria: >12 mo. Baseline data: mean 51.8 w and 46.25 w. Minimum ulcer duration /text): 8 w. | Run-in period of 7+/-3 days, needed to be treated with adequate compression // SOC incl. sharp debridement, hypothermically stored amniotic membrane and multilayer compression. Weekly treatment for up to 12 w.<br><br>^Age, history of tobacco use, DM, history of recurrent ulcers, BMI, ABPI, ulcer age and initial wound size. |
| Murphy 2002 [17]             | 38%  | 67                         | 2.9                           | 6                          | ≥0.8         | No  | NR                              | No RA                                   | NR                                                              | NR, but paired data                                                                        | Serum         | 0h   | ELISA                                          | NR | NR | Yes                      | -80 | Nonhealing VLU with no prior treatment                                                                                                 | No previous treatment prior inclusion // 4-layered compression                                                                                                                                                                                                                                                                       |
| Mwaura 2006 [18]             | 73%  | 60                         | NR                            | NR                         | >0.9 ≥2      | No  | NR                              | No RA                                   | No                                                              | NR                                                                                         | WF and Biopsy | <36h | ELISA (WF) IHC (Biopsy)                        | NR | NR | NR ("frozen immediatly") | -80 | VLU ≥8 w duration                                                                                                                      | NR // 4-layer compression                                                                                                                                                                                                                                                                                                            |
| Pukstad 2010 [19]            | NR   | NR                         | NR                            | NR                         | ≥0.9         | No  | No                              | No                                      | No                                                              | NR                                                                                         | WF            | 4h   | Cytokine antibody glass array. TNF-α: bioassay | NR | NR | No                       | -80 | Chronic VLU                                                                                                                            | NR // Standard moist wound care                                                                                                                                                                                                                                                                                                      |
| Sadler 2012 [20]             | 33%  | Low dose: 65 High dose: 67 | Low dose: 7.3 High dose: 22.7 | Low dose: 6.5 High dose: 4 | ≥0.7         | Yes | NR                              | NR                                      | No                                                              | NR (for outcome of interest)                                                               | WF            | 1h   | ELISA                                          | NR | NR | NR                       | -80 | Non-healing VLU, no reduction in area over the preceding month of standard care.                                                       | SOC: nonadhesive dressing+two inelastic compression bandages and an elastic stocking*// SOC + low dosage or high dosage doxycycline.                                                                                                                                                                                                 |
| Senet 2003 [21]              | 46%  | FAP: 72.3 Placebo: 72.3    | 12.4                          | FAP: 50.6 Placebo: 70      | >0.8         | Yes | No ulcers requiring systemic AB | No RA or connective tissue disorder     | No, systemic treatment with corticosteroi ds or cytotoxic drugs | NR (for outcome of interest)                                                               | WF            | 6h   | ELISA                                          | NR | NR | Yes                      | -80 | Chronic VLU, ≥2 mo and no tendency of healing                                                                                          | Standard topical treatment and compression // Cleansed with saline. Intervention: FAP^ or placebo. Hydrocolloid dressing, graded compression (cotton bandages+elastic bandages).                                                                                                                                                     |

## Cytokines and Venous Leg Ulcer Healing – A Systematic Review

|                    |     |                                     |                                     |             |      |     |                                   |                                         |    |                              |               |                        |                    |    |     |     |                            |                                                                                                                                 |                                                                                                                                                                                                                     |
|--------------------|-----|-------------------------------------|-------------------------------------|-------------|------|-----|-----------------------------------|-----------------------------------------|----|------------------------------|---------------|------------------------|--------------------|----|-----|-----|----------------------------|---------------------------------------------------------------------------------------------------------------------------------|---------------------------------------------------------------------------------------------------------------------------------------------------------------------------------------------------------------------|
| Serra 2013 [22]    | 72% | Mino-cycline: 50.7<br>Control: 51.3 | Mino-cycline: 13.3<br>Control: 11.7 | NR<br>≥ 1.5 | >0.9 | NR  | No bacterial infection within 6 w | No connective tissue disorders incl. RA | NR | NR (for outcome of interest) | WF and plasma | WF: 4 h<br>Plasma: 0 h | ELISA              | NR | Yes | Yes | -80                        | Chronic VLU, ≥6 w                                                                                                               | NR // Either minocycline+basic treatment, or only basic treatment. Some had venous surgery. Basic treatment: third-class compression stocking for 3 mo and then second-class medical compression stocking for 2 mo. |
| Serra 2015 [23]    | 69% | Doxy-cycline: 50.5<br>Control: 51.3 | Doxy-cycline: 12.9<br>Control: 11.7 | NR<br>≥ 1.5 | >0.9 | NR  | No bacterial infection within 6 w | No connective tissue disorders incl. RA | NR | NR (for outcome of interest) | WF and plasma | WF: 4 h<br>Plasma: 0   | ELISA              | NR | Yes | Yes | -80                        | Chronic VLU, ≥6 w                                                                                                               | NR // Either doxycycline + SOC, or only SOC. Third-class compression stocking for 3 mo and then second-class compression stocking for 2 mo. Vein surgery also offered for some.                                     |
| Stacey 2019 [24]   | 50% | 74.5                                | 11.2                                | 4.0         | >0.5 | Yes | NR                                | Yes                                     | NR | NR                           | WF            | 1h                     | Multiplex ELISA    | NR | NR  | NR  | -80                        | Chronic VLU, median duration 4.0 mo, range 0.75-104 mo                                                                          | NR // SOC incl. compression and active or non-active dressings. Different types of compression allowed (most received long stretch bandages)                                                                        |
| Tian 2003 [25]     | 38% | 72                                  | 63.5                                | NR<br>>3    | NR   | NR  | NR                                | NR                                      | NR | NR                           | Biopsy        | 0h                     | IHC                | NA | NA  | NA  | -80 and formalin (unclear) | Chronic VLU failing treatment with compression. No size reduction over >3 mo or rapid increase. Scheduled for skin grafting.    | Compression therapy // Bedrest for 2 w and 6 hourly dressings with saline compresses under admission in hospital                                                                                                    |
| Trengove 2000 [26] | 14% | 72                                  | 45.8^                               | NR<br>>3    | ≥0.6 | NR  | No if IV AB for cellulitis        | NR                                      | NR | NR, but paired data          | WF            | 1h                     | ELISA and bioassay | No | Yes | Yes | -80                        | Nonhealing: no size reduction in 3 mo or increase in size. Scheduled for skin grafting.                                         | Compression for 3 mo // Bedrest, 6 hourly saline compresses under admission in hospital. ^Whole study population                                                                                                    |
| Wallace 1998 [27]  | 38% | 78                                  | 46                                  | NR<br>>3    | NR^  | Yes | NR                                | NR                                      | NR | NR, but paired data          | WF            | 1h                     | ELISA and Bioassay | NR | NR  | Yes | -80                        | Chronic VLU not responding to compression: no ulcer size reduction over >3 mo or increase in size. Scheduled for skin grafting. | Compression // Bedrest, 6 hourly saline compresses under admission in hospital. Îschemia allowed                                                                                                                    |

## Cytokines and Venous Leg Ulcer Healing – A Systematic Review

|              |     |      |            |            |         |     |            |    |    |                              |                 |    |                    |    |    |    |           |                         |                                             |
|--------------|-----|------|------------|------------|---------|-----|------------|----|----|------------------------------|-----------------|----|--------------------|----|----|----|-----------|-------------------------|---------------------------------------------|
| Wiegand 2017 | 14% | 60.5 | NLFU: 13.8 | NFLU: 19.0 | 0.8-1.2 | Yes | No         | NR | NR | No sign. diff. in wound size | WF              | 0h | Luminex            | NR | NR | NR | WF: -80   | Chronic VLU. At         | 2 w run-in period with SOC: 4-layer         |
| [28]         |     |      | SOC: 10.7  |            |         |     | cellulitis |    |    | or wound duration. No        | Biopsy          |    | TGF- $\beta$ : IHC |    |    |    | Biopsy: - | inclusion wound age >30 | compression, nonactive moist wound          |
|              |     |      |            | SOC        |         |     | or osteo-  |    |    | correlation between DM or    | (TGF- $\beta$ ) |    |                    |    |    |    | 80        | days of duration. Size  | dressings, and +/- debridement//SOC and     |
|              |     |      |            | 38.1       |         |     | myelitis   |    |    | adequate/ non-adequate       |                 |    |                    |    |    |    |           | reduction <30% in a 2-w | randomization to either: 1. Noncontact low- |
|              |     |      |            |            |         |     |            |    |    | compression in non-          |                 |    |                    |    |    |    |           | run-in period.          | frequency ultrasound (NFLU) three           |
|              |     |      |            |            |         |     |            |    |    | responders or responders.    |                 |    |                    |    |    |    |           |                         | times/week or control.                      |

\*Assumed.

Abbreviations: AB = Antibiotics; ABPI = Ankle-brachial pressure index; ALA-PDT = Aminolevulinic acid photodynamic therapy; BMI = Body mass index; cDNA = Complementary DNA; CFU = Colony forming unit(s); DM = Diabetes mellitus; ELISA = Enzyme-linked immunosorbent assay; FAP = Frozen allogenic plasma; IHC = Immunohistochemistry; Incl. = Includin/included; IQR = Interquartile range; Luminex = Multiplex Assay; Mo = Months; NA = Not applicable; NLFU = Noncontact low-frequency ultrasound; NR = Not reported; PBMC = Peripheral blood mononuclear cells; Pt = Patients; QRT-PCR = Quantitative reverse transcriptase polymerase chain reaction; RA = Rheumatoid arthritis; RT-PCR = Reverse transcriptase polymerase chain reaction; SOC = Standard of care; VAS = Visual analogue scale; VLU = Venous leg ulcer(s); WF = Wound fluid

### References

- Beidler, S.K.; Douillet, C.D.; Berndt, D.F.; Keagy, B.A.; Rich, P.B.; Marston, W.A. Inflammatory cytokine levels in chronic venous insufficiency ulcer tissue before and after compression therapy. *J Vasc Surg* **2009**, *49*, 1013-1020, doi:10.1016/j.jvs.2008.11.049.
- Charles, C.A.; Tomic-Canic, M.; Vincek, V.; Nassiri, M.; Stojadinovic, O.; Eaglstein, W.H.; Kirsner, R.S. A gene signature of nonhealing venous ulcers: potential diagnostic markers. *J Am Acad Dermatol* **2008**, *59*, 758-771, doi:10.1016/j.jaad.2008.07.018.
- Drinkwater, S.L.; Burnand, K.G.; Ding, R.; Smith, A. Increased but ineffectual angiogenic drive in nonhealing venous leg ulcers. *J Vasc Surg* **2003**, *38*, 1106-1112, doi:10.1016/s0741-5214(03)01053-x.
- Escandon, J.; Vivas, A.C.; Perez, R.; Kirsner, R.; Davis, S. A prospective pilot study of ultrasound therapy effectiveness in refractory venous leg ulcers. *Int Wound J* **2012**, *9*, 570-578, doi:10.1111/j.1742-481X.2011.00921.x.
- Filkor, K.; Németh, T.; Nagy, I.; Kondorosi, É.; Urbán, E.; Kemény, L.; Szolnoky, G. The expression of inflammatory cytokines, TAM tyrosine kinase receptors and their ligands is upregulated in venous leg ulcer patients: a novel insight into chronic wound immunity. *Int Wound J* **2016**, *13*, 554-562, doi:10.1111/iwj.12473.
- Fivenson, D.P.; Faria, D.T.; Nickoloff, B.J.; Poverini, P.J.; Kunkel, S.; Burdick, M.; Strieter, R.M. Chemokine and inflammatory cytokine changes during chronic wound healing. *Wound Repair Regen* **1997**, *5*, 310-322, doi:10.1046/j.1524-475X.1997.50405.x.
- Gohel, M.S.; Windhaber, R.A.; Tarlton, J.F.; Whyman, M.R.; Poskitt, K.R. The relationship between cytokine concentrations and wound healing in chronic venous ulceration. *J Vasc Surg* **2008**, *48*, 1272-1277, doi:10.1016/j.jvs.2008.06.042.
- Grandi, V.; Bacci, S.; Corsi, A.; Sessa, M.; Puliti, E.; Murciano, N.; Scavone, F.; Cappugi, P.; Pimpinelli, N. ALA-PDT exerts beneficial effects on chronic venous ulcers by inducing changes in inflammatory microenvironment, especially through increased TGF-beta release: A pilot clinical and translational study. *Photodiagnosis Photodyn Ther* **2018**, *21*, 252-256, doi:10.1016/j.pdpdt.2017.12.012.
- Harris, I.R.; Yee, K.C.; Walters, C.E.; Cunliffe, W.J.; Kearney, J.N.; Wood, E.J.; Ingham, E. Cytokine and protease levels in healing and non-healing chronic venous leg ulcers. *Exp Dermatol* **1995**, *4*, 342-349, doi:10.1111/j.1600-0625.1995.tb00058.x.
- He, C.F.; Cherry, G.W.; Arnold, F. Postural vasoregulation and mediators of reperfusion injury in venous ulceration. *J Vasc Surg* **1997**, *25*, 647-653, doi:10.1016/s0741-5214(97)70290-8.
- Hodde, J.P.; Hiles, M.C.; Metzger, D.W. Characterization of the local wound environment following treatment of chronic leg ulcers with SIS wound matrix. *J Tissue Viability* **2020**, *29*, 42-47, doi:10.1016/j.jtv.2019.12.003.

12. Krejner, A.; Litwiniuk, M.; Grzela, T. LL-37 but Not 25-Hydroxy-Vitamin D Serum Level Correlates with Healing of Venous Leg Ulcers. *Arch Immunol Ther Exp (Warsz)* **2017**, *65*, 455-461, doi:10.1007/s00005-016-0423-9.
13. Lagattolla, N.R.; Stacey, M.C.; Burnand, K.G.; Gaffney, P.G. Growth factors, tissue and urokinase-type plasminogen activators in venous ulcers. *Ann Cardiol Angeiol (Paris)* **1995**, *44*, 299-303.
14. Ligi, D.; Mosti, G.; Croce, L.; Raffetto, J.D.; Mannello, F. Chronic venous disease - Part I: Inflammatory biomarkers in wound healing. *Biochim Biophys Acta* **2016**, *1862*, 1964-1974, doi:10.1016/j.bbdis.2016.07.018.
15. Ligi, D.; Croce, L.; Mosti, G.; Raffetto, J.D.; Mannello, F. Chronic Venous Insufficiency: Transforming Growth Factor- $\beta$  Isoforms and Soluble Endoglin Concentration in Different States of Wound Healing. *Int J Mol Sci* **2017**, *18*, doi:10.3390/ijms18102206.
16. McQuilling, J.P.; Carter, M.J.; Fulton, J.A.; Patel, K.; Doner, B.; Serena, T.E.; Mowry, K.C. A prospective clinical trial evaluating changes in the wound microenvironment in patients with chronic venous leg ulcers treated with a hypothermically stored amniotic membrane. *Int Wound J* **2021**, *19*, doi:10.1111/iwj.13606.
17. Murphy, M.A.; Joyce, W.P.; Condron, C.; Bouchier-Hayes, D. A reduction in serum cytokine levels parallels healing of venous ulcers in patients undergoing compression therapy. *Eur J Vasc Endovasc Surg* **2002**, *23*, 349-352, doi:10.1053/ejvs.2002.1597.
18. Mwaura, B.; Mahendran, B.; Hynes, N.; Defreitas, D.; Avalos, G.; Adegbola, T.; Adham, M.; Connolly, C.E.; Sultan, S. The impact of differential expression of extracellular matrix metalloproteinase inducer, matrix metalloproteinase-2, tissue inhibitor of matrix metalloproteinase-2 and PDGF-AA on the chronicity of venous leg ulcers. *Eur J Vasc Endovasc Surg* **2006**, *31*, 306-310, doi:10.1016/j.ejvs.2005.08.007.
19. Pukstad, B.S.; Ryan, L.; Flo, T.H.; Stenvik, J.; Moseley, R.; Harding, K.; Thomas, D.W.; Espevik, T. Non-healing is associated with persistent stimulation of the innate immune response in chronic venous leg ulcers. *J Dermatol Sci* **2010**, *59*, 115-122, doi:10.1016/j.jdermsci.2010.05.003.
20. Sadler, G.M.; Wallace, H.J.; Stacey, M.C. Oral doxycycline for the treatment of chronic leg ulceration. *Archives of dermatological research* **2012**, *304*, 487-493, doi:10.1007/s00403-011-1201-5.
21. Senet, P.; Bon, F.X.; Benbunan, M.; Bussel, A.; Traineau, R.; Calvo, F.; Dubertret, L.; Dosquet, C. Randomized trial and local biological effect of autologous platelets used as adjuvant therapy for chronic venous leg ulcers. *J Vasc Surg* **2003**, *38*, 1342-1348, doi:10.1016/s0741-5214(03)00908-x.
22. Serra, R.G., R.; Buffone, G.; Gallelli, L.; De Franciscis, S. The effects of minocycline on extracellular matrix in patients with chronic venous leg ulcers. *Acta Phlebologica* **2013**, *14*, 99-107.
23. Serra, R.; Gallelli, L.; Buffone, G.; Molinari, V.; Stillitano, D.M.; Palmieri, C.; de Franciscis, S. Doxycycline speeds up healing of chronic venous ulcers. *Int Wound J* **2015**, *12*, 179-184, doi:10.1111/iwj.12077.
24. Stacey, M.C.; Phillips, S.A.; Farrokhyar, F.; Swaine, J.M. Evaluation of wound fluid biomarkers to determine healing in adults with venous leg ulcers: A prospective study. *Wound Repair Regen* **2019**, *27*, 509-518, doi:10.1111/wrr.12723.
25. Tian, Y.W.; Stacey, M.C. Cytokines and growth factors in keratinocytes and sweat glands in chronic venous leg ulcers. An immunohistochemical study. *Wound Repair Regen* **2003**, *11*, 316-325, doi:10.1046/j.1524-475x.2003.11502.x.
26. Trengove, N.J.; Bielefeldt-Ohmann, H.; Stacey, M.C. Mitogenic activity and cytokine levels in non-healing and healing chronic leg ulcers. *Wound Repair Regen* **2000**, *8*, 13-25, doi:10.1046/j.1524-475x.2000.00013.x.
27. Wallace, H.J.; Stacey, M.C. Levels of tumor necrosis factor-alpha (TNF-alpha) and soluble TNF receptors in chronic venous leg ulcers--correlations to healing status. *J Invest Dermatol* **1998**, *110*, 292-296, doi:10.1046/j.1523-1747.1998.00113.x.
28. Wiegand, C.; Bittenger, K.; Galiano, R.D.; Driver, V.R.; Gibbons, G.W. Does noncontact low-frequency ultrasound therapy contribute to wound healing at the molecular level? *Wound Repair Regen* **2017**, *25*, 871-882, doi:10.1111/wrr.12595.
