# Supplementary material for: Cytokines and Venous Leg Ulcer Healing—A Systematic Review
Source: MDPI journal article supplement (doi:10.3390/ijms23126526), 2022-06-10
Supplement: s1 [file s1]

Supplementary Table S1. Database searches

**EMBASE:** 1974 to 2021 August 17

| Search                                                                                                                                                                                               | Results   |
|------------------------------------------------------------------------------------------------------------------------------------------------------------------------------------------------------|-----------|
| 1 exp leg ulcer/                                                                                                                                                                                     | 14,037    |
| 2 ("Varicose ulcer*" or "leg ulcer*" or "venous ulcer*" or "VLU*" or "venous wound*" or "stasis ulcer*" or "crural ulcer*" or (lower extremity* adj ulcer*) or "ulcus cruris" or "ulcer cruris").mp. | 18,711    |
| 3 1 or 2                                                                                                                                                                                             | 18,711    |
| 4 exp cytokine/                                                                                                                                                                                      | 1,654,214 |
| 5 exp growth factor/                                                                                                                                                                                 | 1,038,312 |
| 6 exp biological marker/                                                                                                                                                                             | 353,491   |
| 7 cytokine*.mp.                                                                                                                                                                                      | 705,876   |
| 8 interleukin*.mp.                                                                                                                                                                                   | 763,076   |
| 9 growth factor*.mp.                                                                                                                                                                                 | 739,406   |
| 10 biomarker*.mp.                                                                                                                                                                                    | 490,812   |
| 11 IL-1*.mp.                                                                                                                                                                                         | 296,698   |
| 12 IL-2*.mp.                                                                                                                                                                                         | 99,191    |
| 13 IL-3*.mp.                                                                                                                                                                                         | 21,164    |
| 14 IL-4*.mp.                                                                                                                                                                                         | 63,421    |
| 15 IL-5*.mp.                                                                                                                                                                                         | 20,522    |
| 16 IL-6*.mp.                                                                                                                                                                                         | 185,132   |
| 17 IL-7*.mp.                                                                                                                                                                                         | 8,694     |
| 18 IL-8*.mp.                                                                                                                                                                                         | 56,490    |
| 19 IL-9*.mp.                                                                                                                                                                                         | 3,210     |
| 20 (IL1* or IL2* or IL3* or IL4* or IL5* or IL6* or IL7* or IL8* or IL9*).mp.                                                                                                                        | 76,328    |
| 21 tumor necrosis factor*.mp.                                                                                                                                                                        | 435,027   |
| 22 TNF*.mp.                                                                                                                                                                                          | 323,493   |
| 23 interferon-gamma*.mp.                                                                                                                                                                             | 63,860    |
| 24 IFN*.mp.                                                                                                                                                                                          | 203,854   |
| 25 vascular endothelial growth factor*.mp.                                                                                                                                                           | 84,396    |
| 26 VEGF*.mp.                                                                                                                                                                                         | 12,4481   |
| 27 granulocyte-macrophage colony-stimulating factor*.mp.                                                                                                                                             | 49,154    |

|    |                                            |           |
|----|--------------------------------------------|-----------|
| 28 | GM-CSF*.mp.                                | 28,201    |
| 29 | granulocyte colony-stimulating factor*.mp. | 60,917    |
| 30 | G-CSF*.mp.                                 | 26,194    |
| 31 | platelet derived growth factor*.mp.        | 53,374    |
| 32 | PDGF*.mp.                                  | 37,223    |
| 33 | transforming growth factor*.mp.            | 175,672   |
| 34 | TGF*.mp.                                   | 140,108   |
| 35 | insulin-like growth factor*.mp.            | 56,514    |
| 36 | IGF*.mp.                                   | 82,465    |
| 37 | epidermal growth factor*.mp.               | 209,018   |
| 38 | EGF*.mp.                                   | 185,093   |
| 39 | fibroblast growth factor*.mp.              | 92,231    |
| 40 | FGF*.mp.                                   | 55,852    |
| 41 | hepatocyte growth factor*.mp.              | 13,620    |
| 42 | HGF*.mp.                                   | 17,006    |
| 43 | macrophage colony-stimulating factor*.mp.  | 53,341    |
| 44 | M-CSF*.mp.                                 | 7332      |
| 45 | keratinocyte growth factor*.mp.            | 4266      |
| 46 | KGF*.mp.                                   | 2810      |
| 47 | nerve growth factor*.mp.                   | 34,970    |
| 48 | NGF*.mp.                                   | 22,275    |
| 49 | S100A8*.mp.                                | 3191      |
| 50 | S100A9*.mp.                                | 2719      |
| 51 | calprotectin*.mp.                          | 8,296     |
| 52 | or/4-51                                    | 3,270,057 |
| 53 | 3 and 52                                   | 1679      |

**PubMed (including MEDLINE)**

| Search                                                                                                                                                                                                                                                                                                                                                                                                                                                                                                                                                                                                                                                                                                                                                                                                                                                                                                                                                                                                                                                                                                                                                                                                                                                                                                                                | Results   |
|---------------------------------------------------------------------------------------------------------------------------------------------------------------------------------------------------------------------------------------------------------------------------------------------------------------------------------------------------------------------------------------------------------------------------------------------------------------------------------------------------------------------------------------------------------------------------------------------------------------------------------------------------------------------------------------------------------------------------------------------------------------------------------------------------------------------------------------------------------------------------------------------------------------------------------------------------------------------------------------------------------------------------------------------------------------------------------------------------------------------------------------------------------------------------------------------------------------------------------------------------------------------------------------------------------------------------------------|-----------|
| "Varicose ulcer"[Mesh]                                                                                                                                                                                                                                                                                                                                                                                                                                                                                                                                                                                                                                                                                                                                                                                                                                                                                                                                                                                                                                                                                                                                                                                                                                                                                                                | 5040      |
| "Varicose ulcer*" OR "leg ulcer*" OR "venous ulcer*" OR "VLU*" OR "venous wound*" OR "stasis ulcer*" OR "crural ulcer*" OR "ulcus cruris" OR "ulcer cruris"                                                                                                                                                                                                                                                                                                                                                                                                                                                                                                                                                                                                                                                                                                                                                                                                                                                                                                                                                                                                                                                                                                                                                                           | 15,801    |
| ("Varicose ulcer"[Mesh]) OR ("Varicose ulcer*" OR "leg ulcer*" OR "venous ulcer*" OR "VLU*" OR "venous wound*" OR "stasis ulcer*" OR "crural ulcer*" OR "ulcus cruris" OR "ulcer cruris")                                                                                                                                                                                                                                                                                                                                                                                                                                                                                                                                                                                                                                                                                                                                                                                                                                                                                                                                                                                                                                                                                                                                             | 15,801    |
| "Cytokines"[Mesh] OR "Biomarkers"[Mesh] OR "Vascular Endothelial Growth Factors"[Mesh] OR "Platelet-Derived Growth Factor"[Mesh] OR "Transforming Growth Factors"[Mesh] OR "Somatomedins"[Mesh] OR "Epidermal Growth Factor"[Mesh] OR "Fibroblast Growth Factors"[Mesh] OR "EGF Family of Proteins"[Mesh] OR "Nerve Growth Factor"[Mesh] OR "Leukocyte L1 Antigen Complex"[Mesh]                                                                                                                                                                                                                                                                                                                                                                                                                                                                                                                                                                                                                                                                                                                                                                                                                                                                                                                                                      | 1,573,710 |
| "cytokine*" OR "interleukin*" OR "growth factor*" OR "biomarker*" OR "IL-1*" OR "IL-2*" OR "IL-3*" OR "IL-4*" OR "IL-5*" OR "IL-6*" OR "IL-7*" OR "IL-8*" OR "IL-9*" OR "IL1*" OR "IL2*" OR "IL3*" OR "IL4*" OR "IL5*" OR "IL6*" OR "IL7*" OR "IL8*" OR "IL9*" OR "IL10*" OR "IL11*" OR "IL12*" OR "IL13*" OR "IL14*" OR "IL15*" OR "IL16*" OR "IL17*" OR "IL18*" OR "IL19*" OR "IL20*" OR "IL21*" OR "IL22*" OR "IL23*" OR "IL24*" OR "IL25*" OR "IL26*" OR "IL27*" OR "IL28*" OR "IL29*" OR "IL30*" OR "IL31*" OR "IL32*" OR "IL33*" OR "IL34*" OR "IL35*" OR "IL36*" OR "IL37*" OR "IL38*" OR "IL39*" OR "IL40*" OR "tumor necrosis factor*" OR "TNF" OR "interferon-gamma*" OR "IFN" OR "vascular endothelial growth factor*" OR "VEGF*" OR "granulocyte-macrophage colony-stimulating factor*" OR "GM-CSF*" OR "granulocyte colony-stimulating factor*" OR "G-CSF*" OR "platelet derived growth factor*" OR "PDGF*" OR "transforming growth factor*" OR "TGF" OR "insulin-like growth factor*" OR "IGF" OR "epidermal growth factor*" OR "EGF" OR "fibroblast growth factor*" OR "FGF" OR "hepatocyte growth factor*" OR "HGF" OR "macrophage colony-stimulating factor*" OR "M-CSF*" OR "keratinocyte growth factor*" OR "KGF" OR "nerve growth factor*" OR "NGF" OR "S100A8*" OR "S100A9*" OR "calprotectin*" OR "Calgranulin" | 903,929   |
| ("Cytokines"[Mesh] OR "Biomarkers"[Mesh] OR "Vascular Endothelial Growth Factors"[Mesh] OR "Platelet-Derived Growth Factor"[Mesh] OR "Transforming Growth Factors"[Mesh] OR "Somatomedins"[Mesh] OR "Epidermal Growth Factor"[Mesh] OR "Fibroblast Growth Factors"[Mesh] OR "EGF Family of Proteins"[Mesh] OR "Nerve Growth Factor"[Mesh] OR "Leukocyte L1 Antigen Complex"[Mesh]) OR ("cytokine*" OR "interleukin*" OR "growth factor*" OR "biomarker*" OR "IL-1*" OR "IL-2*" OR "IL-3*" OR "IL-4*" OR "IL-5*" OR "IL-6*" OR "IL-7*" OR "IL-8*" OR "IL-9*" OR "IL1*" OR "IL2*" OR "IL3*" OR "IL4*" OR "IL5*" OR "IL6*" OR "IL7*" OR "IL8*" OR "IL9*" OR "IL10*" OR "IL11*" OR "IL12*" OR "IL13*" OR "IL14*" OR "IL15*" OR "IL16*" OR "IL17*" OR "IL18*" OR "IL19*" OR "IL20*" OR "IL21*" OR "IL22*" OR "IL23*" OR "IL24*" OR "IL25*" OR "IL26*" OR "IL27*" OR "IL28"                                                                                                                                                                                                                                                                                                                                                                                                                                                                 | 1,874,870 |

OR "IL29\*" OR "IL30\*" OR "IL31\*" OR "IL32\*" OR "IL33\*" OR "IL34\*" OR "IL35\*" OR "IL36\*" OR "IL37\*" OR "IL38\*" OR "IL39\*" OR "IL40\*" OR "tumor necrosis factor\*" OR "TNF" OR "interferon-gamma\*" OR "IFN" OR "vascular endothelial growth factor\*" OR "VEGF\*" OR "granulocyte-macrophage colony-stimulating factor\*" OR "GM-CSF\*" OR "granulocyte colony-stimulating factor\*" OR "G-CSF\*" OR "platelet derived growth factor\*" OR "PDGF\*" OR "transforming growth factor\*" OR "TGF" OR "insulin-like growth factor\*" OR "IGF" OR "epidermal growth factor\*" OR "EGF" OR "fibroblast growth factor\*" OR "FGF" OR "hepatocyte growth factor\*" OR "HGF" OR "macrophage colony-stimulating factor\*" OR "M-CSF\*" OR "keratinocyte growth factor\*" OR "KGF" OR "nerve growth factor\*" OR "NGF" OR "S100A8\*" OR "S100A9\*" OR "calprotectin\*" OR "Calgranulin\*")

((("Varicose ulcer"[Mesh]) OR ("Varicose ulcer\*" OR "leg ulcer\*" OR "venous ulcer\*" OR "VLU\*" OR "venous wound\*" OR "stasis ulcer\*" OR "crural ulcer\*" OR "ulcus cruris" OR "ulcer cruris"))) AND ((("Cytokines"[Mesh] OR "Biomarkers"[Mesh] OR "Vascular Endothelial Growth Factors"[Mesh] OR "Platelet-Derived Growth Factor"[Mesh] OR "Transforming Growth Factors"[Mesh] OR "Somatomedins"[Mesh] OR "Epidermal Growth Factor"[Mesh] OR "Fibroblast Growth Factors"[Mesh] OR "EGF Family of Proteins"[Mesh] OR "Nerve Growth Factor"[Mesh] OR "Leukocyte L1 Antigen Complex"[Mesh]) OR ("cytokine\*" OR "interleukin\*" OR "growth factor\*" OR "biomarker\*" OR "IL-1\*" OR "IL-2\*" OR "IL-3\*" OR "IL-4\*" OR "IL-5\*" OR "IL-6\*" OR "IL-7\*" OR "IL-8\*" OR "IL-9\*" OR "IL1" OR "IL2" OR "IL3" OR "IL4" OR "IL5" OR "IL6" OR "IL7" OR "IL8" OR "IL9" OR "IL10\*" OR "IL11\*" OR "IL12\*" OR "IL13\*" OR "IL14\*" OR "IL15\*" OR "IL16\*" OR "IL17\*" OR "IL18\*" OR "IL19\*" OR "IL20\*" OR "IL21\*" OR "IL22\*" OR "IL23\*" OR "IL24\*" OR "IL25\*" OR "IL26\*" OR "IL27\*" OR "IL28\*" OR "IL29\*" OR "IL30\*" OR "IL31\*" OR "IL32\*" OR "IL33\*" OR "IL34\*" OR "IL35\*" OR "IL36\*" OR "IL37\*" OR "IL38\*" OR "IL39\*" OR "IL40\*" OR "tumor necrosis factor\*" OR "TNF" OR "interferon-gamma\*" OR "IFN" OR "vascular endothelial growth factor\*" OR "VEGF\*" OR "granulocyte-macrophage colony-stimulating factor\*" OR "GM-CSF\*" OR "granulocyte colony-stimulating factor\*" OR "G-CSF\*" OR "platelet derived growth factor\*" OR "PDGF\*" OR "transforming growth factor\*" OR "TGF" OR "insulin-like growth factor\*" OR "IGF" OR "epidermal growth factor\*" OR "EGF" OR "fibroblast growth factor\*" OR "FGF" OR "hepatocyte growth factor\*" OR "HGF" OR "macrophage colony-stimulating factor\*" OR "M-CSF\*" OR "keratinocyte growth factor\*" OR "KGF" OR "nerve growth factor\*" OR "NGF" OR "S100A8\*" OR "S100A9\*" OR "calprotectin\*" OR "Calgranulin\*")))

### Web of Science

|    |                                                                                                                                                                                                                                                                                                                                                                                                                                                                                                                                                                                                                                                                                                                       |           |
|----|-----------------------------------------------------------------------------------------------------------------------------------------------------------------------------------------------------------------------------------------------------------------------------------------------------------------------------------------------------------------------------------------------------------------------------------------------------------------------------------------------------------------------------------------------------------------------------------------------------------------------------------------------------------------------------------------------------------------------|-----------|
| 1. | ALL=("Varicose ulcer*" OR "leg ulcer*" OR "venous ulcer*" OR "VLU*" OR "venous wound*" OR "stasis ulcer*" OR "crural ulcer*" OR "ulcus cruris" OR "ulcer cruris")                                                                                                                                                                                                                                                                                                                                                                                                                                                                                                                                                     | 11,234    |
| 2. | ALL=("cytokine*" OR "interleukin*" OR "growth factor*" OR "biomarker*")                                                                                                                                                                                                                                                                                                                                                                                                                                                                                                                                                                                                                                               | 1,596,567 |
| 3. | ALL=("IL-1*" OR "IL-2*" OR "IL-3*" OR "IL-4*" OR "IL-5*" OR "IL-6*" OR "IL-7*" OR "IL-8*" OR "IL-9*" OR "IL1" OR "IL2" OR "IL3" OR "IL4" OR "IL5" OR "IL6" OR "IL7" OR "IL8" OR "IL9" OR "IL10*" OR "IL11*" OR "IL12*" OR "IL13*" OR "IL14*" OR "IL15*" OR "IL16*" OR "IL17*" OR "IL18*" OR "IL19*" OR "IL20*" OR "IL21*" OR "IL22*" OR "IL23*" OR "IL24*" OR "IL25*" OR "IL26*" OR "IL27*" OR "IL28*" OR "IL29*" OR "IL30*" OR "IL31*" OR "IL32*" OR "IL33*" OR "IL34*" OR "IL35*" OR "IL36*" OR "IL37*" OR "IL38*" OR "IL39*" OR "IL40*")                                                                                                                                                                           | 1,923,496 |
| 4. | ALL=("tumor necrosis factor*" OR "TNF" OR "interferon-gamma*" OR "IFN" OR "vascular endothelial growth factor*" OR "VEGF*" OR "granulocyte-macrophage colony-stimulating factor*" OR "GM-CSF*" OR "granulocyte colony-stimulating factor*" OR "G-CSF*" OR "platelet derived growth factor*" OR "PDGF*" OR "transforming growth factor*" OR "TGF" OR "insulin-like growth factor*" OR "IGF" OR "epidermal growth factor*" OR "EGF" OR "fibroblast growth factor*" OR "FGF" OR "hepatocyte growth factor*" OR "HGF" OR "macrophage colony-stimulating factor*" OR "M-CSF*" OR "keratinocyte growth factor*" OR "KGF" OR "nerve growth factor*" OR "NGF" OR "S100A8*" OR "S100A9*" OR "calprotectin*" OR "Calgranulin*") | 1,029,952 |
| 5. | ((#2) OR #3) OR #4                                                                                                                                                                                                                                                                                                                                                                                                                                                                                                                                                                                                                                                                                                    | 3,502,195 |
| 6. | (#1) AND #5                                                                                                                                                                                                                                                                                                                                                                                                                                                                                                                                                                                                                                                                                                           | 1200      |

# Cochrane (CENTRAL)

| Search                                                                                                                                                                                                                                                                                                                                                                                                                                                                                                                                                                                                                                                       | Results |
|--------------------------------------------------------------------------------------------------------------------------------------------------------------------------------------------------------------------------------------------------------------------------------------------------------------------------------------------------------------------------------------------------------------------------------------------------------------------------------------------------------------------------------------------------------------------------------------------------------------------------------------------------------------|---------|
| 1. MeSH descriptor: [Varicose Ulcer] explode all trees                                                                                                                                                                                                                                                                                                                                                                                                                                                                                                                                                                                                       | 658     |
| 2. Varicose ulcer* OR "leg ulcer*" OR "venous ulcer*" OR "VLU*" OR "venous wound*" OR "stasis ulcer*" OR "crural ulcer*" OR "ulcus cruris" OR "ulcer cruris"                                                                                                                                                                                                                                                                                                                                                                                                                                                                                                 | 1757    |
| 3. {or #1-#2}                                                                                                                                                                                                                                                                                                                                                                                                                                                                                                                                                                                                                                                | 1757    |
| 4. MeSH descriptor: [Cytokines] explode all trees                                                                                                                                                                                                                                                                                                                                                                                                                                                                                                                                                                                                            | 20,757  |
| 5. MeSH descriptor: [Intercellular Signaling Peptides and Proteins] explode all trees                                                                                                                                                                                                                                                                                                                                                                                                                                                                                                                                                                        | 28,085  |
| 6. MeSH descriptor: [Biomarkers] explode all trees                                                                                                                                                                                                                                                                                                                                                                                                                                                                                                                                                                                                           | 21,212  |
| 7. cytokine* OR interleukin* OR growth factor* OR biomarker*                                                                                                                                                                                                                                                                                                                                                                                                                                                                                                                                                                                                 | 93, 412 |
| 8. "IL-1*" OR "IL-2*" OR "IL-3*" OR "IL-4*" OR "IL-5*" OR "IL-6*" OR "IL-7*" OR "IL-8*" OR "IL-9*" OR "IL1" OR "IL2" OR "IL3" OR "IL4" OR "IL5" OR "IL6" OR "IL7" OR "IL8" OR "IL9" OR "IL10*" OR "IL11*" OR "IL12*" OR "IL13*" OR "IL14*" OR "IL15*" OR "IL16*" OR "IL17*" OR "IL18*" OR "IL19*" OR "IL20*" OR "IL21*" OR "IL22*" OR "IL23*" OR "IL24*" OR "IL25*" OR "IL26*" OR "IL27*" OR "IL28*" OR "IL29*" OR "IL30*" OR "IL31*" OR "IL32*" OR "IL33*" OR "IL34*" OR "IL35*" OR "IL36*" OR "IL37*" OR "IL38*" OR "IL39*" OR "IL40"                                                                                                                      | 2178    |
| 9. tumor necrosis factor* OR TNF* OR interferon-gamma* OR IFN* OR vascular endothelial growth factor* OR VEGF* OR granulocyte-macrophage colony-stimulating factor* OR GM-CSF* OR granulocyte colony-stimulating factor* OR G-CSF* OR platelet derived growth factor* OR PDGF* OR transforming growth factor* OR "TGF" OR insulin-like growth factor* OR IGF* OR epidermal growth factor* OR EGF* OR fibroblast growth factor* OR FGF* OR hepatocyte growth factor* OR HGF* OR macrophage colony-stimulating factor* OR M-CSF* OR keratinocyte growth factor* OR KGF* OR nerve growth factor* OR NGF* OR S100A8* OR S100A9* OR calprotectin* OR Calgranulin* | 65,763  |
| 10. {or #4-#9}                                                                                                                                                                                                                                                                                                                                                                                                                                                                                                                                                                                                                                               | 136,361 |
| 11. #3 and #10                                                                                                                                                                                                                                                                                                                                                                                                                                                                                                                                                                                                                                               | 142     |

**ALL DATABASES COMBINED: 3515 (including duplicates)**
