# Supplementary material for: Cytokines and Venous Leg Ulcer Healing—A Systematic Review
Source: Int J Mol Sci. 2022 Jun 10;23(12):6526. doi: 10.3390/ijms23126526 (PMC9224200; doi:10.3390/ijms23126526)
Supplement: Supplementary file 1 [file ijms-23-06526-s001.zip]

Archive with 5 entries (5 files):
- Supplementary Table S1_Database searches.pdf
- Supplementary Table S2_Patient characteristics and methodology.pdf
- Supplementary Table S3_Outcomes and time-point of biomarker collection.pdf
- Supplementary Table S4_Overview of results for each study.pdf
- Supplementary Table S5_Overview of results for each cytokine.xlsx
