# Supplementary material for: Cytokines and Venous Leg Ulcer Healing—A Systematic Review
Source: Int J Mol Sci. 2022 Jun 10;23(12):6526. doi: 10.3390/ijms23126526 (PMC9224200; doi:10.3390/ijms23126526)
Supplement: Supplementary file 1 [file ijms-23-06526-s001.zip › Supplementary Table S5_Overview of results for each cytokine.xlsx]

## Sheet: CYTOKINES
Cytokines and venous leg ulcer healing - A systematic review
Supplementary Table S5. Overview of results for each cytokine. References are found in the main paper.
Biomarker	Reference	Specimen	Method	Results (green indicates a significant result or trend)	P	Fold change/ Correlation cofficient	Duration of follow-up	Time point of speciemen collection	Paired data	n (patients)	Conc. Healing (mean)	Conc. Non-healing (mean)	Unit
IL-1
IL-1 bio	Trengove 2000	WF	Bioassay	Elevated in non-healing vs. healing	0.003	3.4	2 w	Baseline and 2 w	Yes	14	Median 2700	Median 9200	U/mL
IL-1𝜶
IL-1𝜶	Trengove 2000	WF	ELISA	Elevated in non-healing vs. healing	0.01	4.2	2 w	Baseline and 2 w	Yes	14	Median 1485	Median 6184	pg/mL
IL-1𝜶	Tian 2003	Biopsy, keratinocytes, intact skin	IHC	Elevated in non-healing vs. healing	<0.01	NA	2 w	Baseline and 2 w	Yes	15	NA	NA	Grading of staining: negative, weak, moderate, intense
IL-1𝜶	Filkor 2016	PBMC (blood)	QRT-PCR	Elevated in non-healing vs. healing	<0.05	150 vs. 9	4 w	Unclear	No	69	Fold over healthy control: 9	Fold over healthy control: 150	Fold over healthy control
IL-1𝜶	McQuilling 2021	WF	Multiplex MAP arrays	Elevated in non-healing vs. healing	0.0131	2.0	12 w	1, 2, 3, 4, 12 w	No, repeated measurements	15	2335	4610	pg/mL
IL-1𝜶	Escandon 2012	Biopsy	RT-PCR	Negative correlation between cytokine change and healing	0.0351	Corr -0.84	4 w	Baseline and 4 w	Assumed	7	NA	NA	NA
IL-1𝜶	Beidler 2009	Biopsy	Multiplex assay	Elevated in rapid healers vs. delayed before compression	0.02	4.1	4 w	Baseline	No	29	1.43	0.35	pg/mg protein
IL-1𝜶	Beidler 2009	Biopsy	Multiplex assay	Elevated before vs. after compression	0.045	3.2	4 w	Baseline and 4 w	Yes	29	Before compression 0.89	After compression 0.28	pg/µg protein
IL-1𝜶	Harris 1995	WF	ELISA	No difference non-healing vs. healing	>0.05	NA	No follow-up	Baseline	No	18	5886 pg/mL 0.50 pg/µg albumin	5675 pg/mL 0.52 pg/µg albumin	pg/mL pg/µg albumin
IL-1𝜶	Tian 2003	Biopsy, keratinocytes, ulcer edge	IHC	No difference non-healing vs. healing	NS	NA	2 w	Baseline and 2 w	Yes	15	NA	NA	Grading of staining: negative, weak, moderate, intense
IL-1𝜶	Stacey 2019	WF	Multiplex assay	No difference non-healing vs. healing	0.4222	NA	Up to 13 w	Baseline and weekly up to 13 w	No, repeated measurements	24	1608.9	1819.5	Unknown, likely pg/mL
IL-1𝜶	Beidler 2009	Biopsy	Multiplex assay	No difference rapid vs. delayed healing after compression	>0.05	NA	4 w	4 w	No	29	0.3	0.25	pg/mg protein
IL-1𝜶	McQuilling 2021	WF	Multiplex MAP arrays	No correlation between cytokine levels and percentage wound size reduction	>0.05	NA	12 w	1, 2, 3, 4, 12 w	No, repeated measurements	15	NA	NA	pg/mL, but correlation
IL-1𝜶	Trengove 2000	WF	ELISA	No relationship between the change in ulcer size and the levels	NS	NA	2 w	Baseline and 2 w	Yes	14	NA	NA	pg/mL
IL-1𝜶 bio	Harris 1995	WF	Bioassay	No difference non-healing vs. healing	>0.05	NA	No follow-up	Baseline	No	18	18.14 pg/mL 1.60 fg/µg albumin	35.47 pg/mL 3.04 fg/µg albumin	pg/mL fg/µg albumin
IL-1𝜷
IL-1𝜷	Trengove 2000	WF	ELISA	Elevated in non-healing vs. healing	0.005	2.3	2 w	Baseline and 2 w	Yes	14	Median 7785	Median 17902	pg/mL
IL-1𝜷	Beidler 2009	Biopsy	Multiplex assay	Elevated before vs. after compression	0.007	5.7	4 w	Baseline and 4 w	Yes	29	Before compression 0.17	After compression 0.03	pg/µg protein
IL-1𝜷	Beidler 2009	Biopsy	Multiplex assay	Elevated in rapid healers vs. delayed before compression	0.03	3.3	4 w	Baseline	No	29	0.26	0.08	pg/µg protein
IL-1𝜷	Ligi 2016	WF	Luminex	Elevated in inflammatory vs. granulating	0.0029	2.8	NR, during hospitalization	Baseline, some had two measurements	No, repeated measurements	34	2825	7864	pg/mL
IL-1𝜷	Hodde 2020	WF	Luminex	No difference from baseline between non-healed and healed	>0.05	NA	Up to 12 w	Weekly up to 12 w	Assumed	8	% change from baseline: 63.7%	% change from baseline: 170.1%	NA
IL-1𝜷	Stacey 2019	WF	Multiplex assay	No difference non-healing vs. healing	0.7285	NA	Up to 13 w	Baseline and weekly up to 13 w	No, repeated measurements	24	596.7	576.1	Unknown, likely pg/mL
IL-1𝜷	McQuilling 2021	WF	Multiplex MAP arrays	No difference non-healing vs. healing	>0.05	NA	12 w	1, 2, 3, 4, 12 w	No, repeated measurements	15	NR	NR	pg/mL
IL-1𝜷	Beidler 2009	Biopsy	Multiplex assay	No difference rapid vs. delayed healing after compression	>0.05	NA	4 w	4 w	No	29	0.03	0.03	pg/µg protein
IL-1𝜷	Gohel 2008	WF	Sandwich ELISA	No correlation between concentration at baseline and subsequent healing	NS	NA	5 w	Baseline	No	34	NR	NR	pg/mL but correlation
IL-1𝜷	McQuilling 2021	WF	Multiplex MAP arrays	No correlation between cytokine levels and percentage wound size reduction	>0.05	NA	12 w	1, 2, 3, 4, 12 w	No, repeated measurements	15	NA	NA	pg/mL, but correlation
IL-1𝜷	Gohel 2008	WF	Sandwich ELISA	No correlation between cytokine change and ulcer size change	0.931	Corr 0.028	5 w	Baseline and 5 w	Yes	34	NR	NR	pg/mL but correlation
IL-1𝜷	He 1997	Serum leg and arm	Sandwhich enzyme immunoassay	No association between baseline levels or changes in their concentration with healing	>0.05	NA	Assumed 3.5 h	Baseline, 10, 30, 60 and 120 min	Yes	10	NR	NR	pg/mL
IL-1𝜷	Trengove 2000	WF	ELISA	No relationship between the change in ulcer size and the levels	NS	NA	2 w	Baseline and 2 w	Yes	14	NA	NA	pg/mL
IL-1𝜷	Gohel 2008	Serum	Sandwich ELISA	No detection in serum	NA	NA	5 w	Baseline and 5 w	NA	34	NR	NR	pg/mL but correlation
IL-1𝜷 bio	Harris 1995	WF	Bioassay	No difference non-healing vs. healing	>0.05	NA	No follow-up	Baseline	No	18	2.48 pg/mL 0.22 fg/µg albumin	5.35 pg/mL 0.46 fg/µg albumin	pg/mL fg/µg albumin
IL-1 Ra
IL-1 Ra	McQuilling 2021	WF	Multiplex MAP arrays	Elevated in non-healing vs. healing	0.0029	1.4	12 w	1, 2, 3, 4, 12 w	No, repeated measurements	15	5250	7328	pg/mL
IL-1 Ra	McQuilling 2021	WF	Multiplex MAP arrays	Negative correlation between cytokine levels and percentage size reduction	<0.05	Corr R2 0.0895	12 w	1, 2, 3, 4, 12 w	No, repeated measurements	15	NA	NA	pg/mL, but correlation
IL-1 Ra	Beidler 2009	Biopsy	Multiplex assay	Elevated in rapid healers after compression	0.02	1.7	4 w	4 w	No	29	25.3	15	pg/µg protein
IL-1 Ra	Beidler 2009	Biopsy	Multiplex assay	No difference before vs. after compression	>0.05	NA	4 w	Baseline and 4 w	Yes	29	Before compression 16.38	After compression 20.13	pg/µg protein
IL-1 Ra	Stacey 2019	WF	Multiplex assay	No difference non-healing vs. healing	0.1545	NA	Up to 13 w	Baseline and weekly up to 13 w	No, repeated measurements	24	4459.1	5118.4	Unknown, likely pg/mL
IL-1 Ra	Ligi 2016	WF	Luminex	No difference inflammatory vs. granulating	>0.05	NA	NR, during hospitalization	Baseline, some had two measurements	No, but some had two measurements	34	5154	6331	pg/mL
IL-1 Ra	Beidler 2009	Biopsy	Multiplex assay	No difference rapid vs. delayed healing before compression	>0.05	NA	4 w	Baseline	No	29	20	12	pg/µg protein
IL-1 Ra	He 1997	Serum leg and arm	Sandwhich enzyme immunoassay	No association between baseline levels or changes in their concentration with healing	>0.05	NA	Assumed 3.5 h	Baseline, 10, 30, 60 and 120 min	Yes	10	NR	NR	pg/mL
IL-2
IL-2	McQuilling 2021	WF	Multiplex MAP arrays	Elevated in non-healing vs. healing	0.0075	1.9	12 w	1, 2, 3, 4, 12 w	No, repeated measurements	15	2.4	4.6	pg/mL
IL-2	Stacey 2019	WF	Multiplex assay	No difference non-healing vs. healing	0.3213	NA	Up to 13 w	Baseline and weekly up to 13 w	No, repeated measurements	24	66.3	253.3	Unknown, likely pg/mL
IL-2	Hodde 2020	WF	Luminex	No difference from baseline between non-healed and healed	>0.05	NA	Up to 12 w	Weekly up to 12 w	Assumed	8	% change from baseline: NR	% change from baseline: NR	NA
IL-2	Ligi 2016	WF	Luminex	No difference inflammatory vs. granulating	>0.05	NA	NR, during hospitalization	Baseline, some had two measurements	No, repeated measurements	34	17.3	13.7	pg/mL
IL-2	McQuilling 2021	WF	Multiplex MAP arrays	No correlation between cytokine levels and percentage wound size reduction	>0.05	NA	12 w	1, 2, 3, 4, 12 w	No, repeated measurements	15	NA	NA	pg/mL, but correlation
IL-3
IL-3	McQuilling 2021	WF	Multiplex MAP arrays	Elevated in non-healing vs. healing	0.0153	1.9	12 w	1, 2, 3, 4, 12 w	No, repeated measurements	15	0.3	0.58	pg/mL
IL-3	McQuilling 2021	WF	Multiplex MAP arrays	No correlation between cytokine levels and percentage wound size reduction	>0.05	NA	12 w	1, 2, 3, 4, 12 w	No, repeated measurements	15	NA	NA	pg/mL, but correlation
IL-4
IL-4	Stacey 2019	WF	Multiplex assay	No difference non-healing vs. healing	0.1799	NA	Up to 13 w	Baseline and weekly up to 13 w	No, repeated measurements	24	13.9	3.7	Unknown, likely pg/mL
IL-4	McQuilling 2021	WF	Multiplex MAP arrays	No difference non-healing vs. healing	>0.05	NA	12 w	1, 2, 3, 4, 12 w	No, repeated measurements	15	NR	NR	pg/mL
IL-4	Beidler 2009	Biopsy	Multiplex assay	No difference rapid vs. delayed healing before or after compression	>0.05	NA	Baseline and 4 w	Baseline	No	29	NR	NR	pg/µg protein
IL-4	Hodde 2020	WF	Luminex	No difference from baseline between non-healed and healed	>0.05	NA	Up to 12 w	Weekly up to 12 w	Assumed	8	% change from baseline: NR	% change from baseline: NR	NA
IL-4	McQuilling 2021	WF	Multiplex MAP arrays	No correlation between cytokine levels and percentage wound size reduction	>0.05	NA	12 w	1, 2, 3, 4, 12 w	No, repeated measurements	15	NA	NA	pg/mL, but correlation
IL-4	Ligi 2016	WF	Luminex	No difference inflammatory vs. granulating	>0.05	NA	NR, during hospitalization	Baseline, some had two measurements	No, repeated measurements	34	2.0	2.7	pg/mL
IL-4	Beidler 2009	Biopsy	Multiplex assay	No difference before vs. after compression	>0.05	NA	4 w	Baseline and 4 w	Yes	29	Before compression 0.03	After compression 0.02	pg/µg protein
IL-5
IL-5	Stacey 2019	WF	Multiplex assay	No difference non-healing vs. healing	0.6304	NA	Up to 13 w	Baseline and weekly up to 13 w	No, repeated measurements	24	19.2	14.8	Unknown, likely pg/mL
IL-5	McQuilling 2021	WF	Multiplex MAP arrays	No difference non-healing vs. healing	>0.05	NA	12 w	1, 2, 3, 4, 12 w	No, repeated measurements	15	NR	NR	pg/mL
IL-5	Hodde 2020	WF	Luminex	No difference from baseline between non-healed and healed	>0.05	NA	Up to 12 w	Weekly up to 12 w	Assumed	8	% change from baseline: NR	% change from baseline: NR	NA
IL-5	McQuilling 2021	WF	Multiplex MAP arrays	No correlation between cytokine levels and percentage wound size reduction	>0.05	NA	12 w	1, 2, 3, 4, 12 w	No, repeated measurements	15	NA	NA	pg/mL, but correlation
IL-5	Ligi 2016	WF	Luminex	No difference inflammatory vs. granulating	>0.05	NA	NR, during hospitalization	Baseline, some had two measurements	No, repeated measurements	34	6.7	1.8	pg/mL
IL-6
IL-6 bio	Harris 1995	WF	Bioassay	No sign. differnece healing/non-healing	>0.05	NS					55404	39233	pg/mL
IL-6 bio	Harris 1995	WF	Bioassay	No sign. differnece healing/non-healing	>0.05	NS					3.56	3.25	pg/mL
IL-6	Beidler 2011	Biopsy	Multiplex assay	No sign. differnece rapid/delayed healing before or after compression	>0.05	NS					NR	NR	pg/mg protein
IL-6	Stacey 2019	WF	Multiplex assay	Univariate analysis: Elevated in healing Multivariate: No difference healing vs. non-healing	0.0348**	1.1	Up to 13 w	Baseline and weekly up to 13 w	No, repeated measurements	24	3962.7	3550.5	Unknown, likely pg/mL
IL-6	Tian 2003	Biopsy, keratinocytes, intact skin	IHC	Elevated in non-healing vs. healing	<0.01	NA	2 w	Baseline and 2 w	Yes	14	NA	NA	Grading of staining: negative, weak, moderate, intense
IL-6	Wiegand 2017	WF	Multiplex immunoassay, Luminex	Negative correlation to reduction of wound size (prediction of healing)	<0.05	Corr -0.3814	4 w	Baseline, 2 w	Unclear	36	NA	NA	pg/mL, but correlation
IL-6	Escandon 2012	Biopsy	RT-PCR	Negative correlation between cytokine change and healing	0.0508	Corr -0.81	4 w	Baseline and 4 w	NR but assumed	7	NA	NA	NA
IL-6	Beidler 2009	Biopsy	Multiplex assay	Elevated before vs. after compression	0.013	2.0	4 w	Baseline and 4 w	Yes	29	Before compression 1.27	After compression 0.62	pg/µg protein
IL-6	Trengove 2000	WF	ELISA	No difference non-healing vs. healing	0.14	NS	2 w	Baseline and 2 w	Yes	14	Median 55185	Median 77762	pg/mL
IL-6	McQuilling 2021	WF	Multiplex MAP arrays	No difference non-healing vs. healing	>0.05	NA	12 w	1, 2, 3, 4, 12 w	No, repeated measurements	15	NR	NR	pg/mL
IL-6	Tian 2003	Biopsy, keratinocytes, ulcer edge	IHC	No difference non-healing vs. healing	NS	NA	2 w	Baseline and 2 w	Yes	14	NA	NA	Grading of staining: negative, weak, moderate, intense
IL-6	Ligi 2016	WF	Luminex	No difference inflammatory vs. granulating	>0.05	NA	NR, during hospitalization	Baseline, some had two measurements	No, but some had two measurements	34	7517	8204	pg/mL
IL-6	Krejner 2017	Serum	ELISA	No difference among healing groups (poor, moderate, good, or fast healer)*	NS**	NA	No follow-up	NR, baseline assumed	No	19	NR	NR	pg/mL
IL-6	He 1997	Serum leg and arm	Sandwhich enzyme immunoassay	No association between baseline levels or changes in their concentration with healing	>0.05	NA	Assumed 3.5 h	Baseline, 10, 30, 60 and 120 min	Yes	10	NR	NR	pg/mL
IL-6	McQuilling 2021	WF	Multiplex MAP arrays	No correlation between cytokine levels and percentage wound size reduction	>0.05	NA	12 w	1, 2, 3, 4, 12 w	No, repeated measurements	15	NA	NA	pg/mL, but correlation
IL-6	Trengove 2000	WF	ELISA	No relationship between the change in ulcer size and the levels	NS	NA	2 w	Baseline and 2 w	Yes	14	NA	NA	pg/mL
IL-6	Beidler 2009	Biopsy	Multiplex assay	No difference rapid vs. delayed healing before or after compression	>0.05	NA	4 w	Baseline and 4 w	No	29	NR	NR	pg/µg protein
IL-6 bio	Trengove 2000	WF	Bioassay	Elevated in non-healing vs. healing	0.013	3.5	2 w	Baseline and 2 w	Yes	14	Median 280	Median 980	U/mL
IL-6 bio	Harris 1995	WF	Bioassay	No difference non-healing vs. healing	>0.05	NA	No follow-up	Baseline	No	16	54404 pg/mL 3.56 pg/µg albumin	39233 pg/mL 3.25 pg/µg albumin	pg/mL fg/µg albumin
IL-7
IL-7	McQuilling 2021	WF	Multiplex MAP arrays	Negative correlation between cytokine levels and percentage size reduction	<0.05	Corr R2 0.0584	12 w	1, 2, 3, 4, 12 w	No, repeated measurements	15	NA	NA	pg/mL, but correlation
IL-7	Stacey 2019	WF	Multiplex assay	No difference non-healing vs. healing	0.4572	NA	Up to 13 w	Baseline and weekly up to 13 w	No, repeated measurements	24	12.9	11.4	Unknown, likely pg/mL
IL-7	McQuilling 2021	WF	Multiplex MAP arrays	No difference non-healing vs. healing	>0.05	NA	12 w	1, 2, 3, 4, 12 w	No, repeated measurements	15	NR	NR	pg/mL
IL-7	Ligi 2016	WF	Luminex	No difference inflammatory vs. granulating	>0.05	NA	NR, during hospitalization	Baseline, some had two measurements	No, repeated measurements	34	2.3	7.4	pg/mL
IL-8
IL-8	Senet 2003	WF	ELISA	Elevated in non-healing vs. healing at the end of the study	0.04	2.3	16 w	12 w	Uncertain, likely not	15	29.8	69.7	ng/mg total protein
IL-8	Filkor 2016	PBMC (blood)	QRT-PCR	Elevated in non-healing vs. healing	<0.05	180 vs. 75	4 w	Unclear	No	69	Fold over healthy control: 75	Fold over healthy control: 180	Fold over healthy control
IL-8	McQuilling 2021	WF	Multiplex MAP arrays	Negative correlation between cytokine levels and percentage size reduction	<0.05	Corr R2 0.0857	12 w	1, 2, 3, 4, 12 w	No, repeated measurements	15	NA	NA	pg/mL, but correlation
IL-8	Hodde 2020	WF	Luminex	Reduction from baseline in wounds in healed vs. non-healed	0.05	NA	Up to 12 w	Weekly up to 12 w	Assumed	8	% change from baseline: 57.6%	% change from baseline: 99.8%	NA
IL-8	Ligi 2016	WF	Luminex	Elevated in inflammatory vs. granulating	0.0303	2.0	NR, during hospitalization	Baseline, some had two measurements	No, repeated measurements	34	11750	23290	pg/mL
IL-8	Fivenson 1997	WF	ELISA	Increase in WF with healing w 8 (trend)	0.09	NR	8 w	Baseline and weekly for 8 w	No, repeated measurements	10	NR	NR (unclear from table 1)	ng/mL but correlation
IL-8	Escandon 2012	Biopsy	RT-PCR	Negative correlation between cytokine change and healing (trend)	0.0990	Corr -0.73	4 w	Baseline and 4 w	NR but assumed	7	NA	NA	NA
IL-8	Beidler 2009	Biopsy	Multiplex assay	Elevated before vs. after compression	0.013	4.0	4 w	Baseline and 4 w	Yes	29	Before compression 15.18	After compression 3.80	pg/µg protein
IL-8	Senet 2003	WF	ELISA	No difference in non-healing vs. healing at baseline	>0.05	NA	16 w	Baseline	Uncertain, likely not	15	NR	NR	ng/mg total protein
IL-8	Stacey 2019	WF	Multiplex assay	No difference non-healing vs. healing	0.2718	NA	Up to 13 w	Baseline and weekly up to 13 w	No, repeated measurements	24	802.9	864.2	Unknown, likely pg/mL
IL-8	McQuilling 2021	WF	Multiplex MAP arrays	No difference non-healing vs. healing	>0.05	NA	12 w	1, 2, 3, 4, 12 w	No, repeated measurements	15	NR	NR	pg/mL
IL-8	Krejner 2017	Serum	ELISA	No difference among healing groups (poor, moderate, good, or fast healer)*	NS**	NA	No follow-up	NR, baseline assumed	No	19	NR	NR	pg/mL
IL-8	Beidler 2009	Biopsy	Multiplex assay	No difference rapid vs. delayed healing before or after compression	>0.05	NA	4 w	Baseline and 4 w	No	29	NR	NR	pg/µg protein
IL-9
IL-9	McQuilling 2021	WF	Multiplex MAP arrays	Elevated in non-healing vs. healing	0.0001	2.0	12 w	1, 2, 3, 4, 12 w	No, repeated measurements	15	0.93	1.9	pg/mL
IL-9	McQuilling 2021	WF	Multiplex MAP arrays	No correlation between cytokine levels and percentage wound size reduction	>0.05	NA	12 w	1, 2, 3, 4, 12 w	No, repeated measurements	15	NA	NA	pg/mL, but correlation
IL-9	Ligi 2016	WF	Luminex	No difference inflammatory vs. granulating	>0.05	NA	NR, during hospitalization	Baseline, some had two measurements	No, repeated measurements	34	37.0	43.3	pg/mL
IL-10
IL-10	Ligi 2016	WF	Luminex	Elevated in inflammatory vs. granulating	0.0490	1.4	NR, during hospitalization	Baseline, some had two measurements	No, repeated measurements	34	27.9	38.4	pg/mL
IL-10	Beidler 2009	Biopsy	Multiplex assay	Elevated after vs. before compression (trend)	0.076	NA	4 w	Baseline and 4 w	Yes	29	Before compression 0.04	0.04	pg/µg protein
IL-10	Stacey 2019	WF	Multiplex assay	No difference non-healing vs. healing	0.574	NA	Up to 13 w	Baseline and weekly up to 13 w	No, repeated measurements	24	137.7	156.2	Unknown, likely pg/mL
IL-10	McQuilling 2021	WF	Multiplex MAP arrays	No difference non-healing vs. healing	>0.05	NA	12 w	1, 2, 3, 4, 12 w	No, repeated measurements	15	NR	NR	pg/mL
IL-10	Filkor 2016	PBMC (blood)	QRT-PCR	No difference non-healing vs. healing	0.248	NA	4 w	Unclear	No	69	Fold over healthy control: 105	Fold over healthy control: 65	Fold over healthy control
IL-10	Beidler 2009	Biopsy	Multiplex assay	No difference rapid vs. delayed healing before or after compression	>0.05	NA	4 w	Baseline and 4 w	No	29	NR	NR	pg/µg protein
IL-10	Hodde 2020	WF	Luminex	No difference from baseline between non-healed and healed	>0.05	NA	Up to 12 w	Weekly up to 12 w	Assumed	8	% change from baseline: NR	% change from baseline: NR	NA
IL-10	Fivenson 1997	WF	ELISA	No increase with healing	>0.05	NA	8 w	Baseline and weekly for 8 w	No, repeated measurements	10	NR	NR (unclear from table 1 )	ng/mL but correlation
IL-10	Wiegand 2017	WF	Luminex	No correlation to reduction of wound size (prediction of healing)	>0.05	NA	4 w	Baseline, 2	Unclear	36	NA	NA	pg/mL, but correlation
IL-10	McQuilling 2021	WF	Multiplex MAP arrays	No correlation between cytokine levels and percentage wound size reduction	>0.05	NA	12 w	1, 2, 3, 4, 12 w	No, repeated measurements	15	NA	NA	pg/mL, but correlation
IL-11
IL-11	Escandon 2012	Biopsy	RT-PCR	Negative correlation between cytokine change and healing (trend)	0.0816	Corr -0.76	4 w	Baseline and 4 w	NR but assumed	7	NA	NA	NA
IL-11	Stacey 2019	WF	Multiplex assay	No difference non-healing vs. healing	0.871	NS	Up to 13 w	Baseline and weekly up to 13 w	No, repeated measurements	24	938.8	981.7	Unknown, likely pg/mL
IL-12
IL-12p40	Beidler 2009	Biopsy	Multiplex assay	Elevated in rapid vs. delayed healing before compression	0.01	2.4	4 w	Baseline	No	29	2.24	121.3	pg/µg protein
IL-12p40	Beidler 2009	Biopsy	Multiplex assay	Elevated before vs. after compression	0.016	1.9	4 w	Baseline and 4 w	Yes	29	Before compression 1.65	After compression 0.85	pg/µg protein
IL-12p40	Stacey 2019	WF	Multiplex assay	No difference non-healing vs. healing	0.1676	NA	Up to 13 w	Baseline and weekly up to 13 w	No, repeated measurements	24	1170	534.4	Unknown, likely pg/mL
IL-12p40	McQuilling 2021	WF	Multiplex MAP arrays	No difference non-healing vs. healing	>0.05	NA	12 w	1, 2, 3, 4, 12 w	No, repeated measurements	15	NR	NR	pg/mL
IL-12p40	Beidler 2009	Biopsy	Multiplex assay	No difference rapid vs. delayed healing after compression	>0.05	NA	4 w	4 w	No	29	0.9	NR	pg/µg protein
IL-12p40	McQuilling 2021	WF	Multiplex MAP arrays	No correlation between cytokine levels and percentage wound size reduction	>0.05	NA	12 w	1, 2, 3, 4, 12 w	No, repeated measurements	15	NA	NA	pg/mL, but correlation
IL-12p70	Ligi 2016	WF	Luminex	Elevated in inflammatory vs. granulating	0.0002	2.2	NR, during hospitalization	Baseline, some had two measurements	No, repeated measurements	34	54.4	121.3	pg/mL
IL-12p70	McQuilling 2021	WF	Multiplex MAP arrays	No difference non-healing vs. healing	>0.05	NA	12 w	1, 2, 3, 4, 12 w	No, repeated measurements	15	NR	NR	pg/mL
IL-12p70	Stacey 2019	WF	Multiplex assay	No difference non-healing vs. healing	0.2273	NA	Up to 13 w	Baseline and weekly up to 13 w	No, repeated measurements	24	2.7	1.4	Unknown, likely pg/mL
IL-12p70	McQuilling 2021	WF	Multiplex MAP arrays	No correlation between cytokine levels and percentage wound size reduction	>0.05	NA	12 w	1, 2, 3, 4, 12 w	No, repeated measurements	15	NA	NA	pg/mL, but correlation
IL-12p70	Hodde 2020	WF	Luminex	No difference from baseline between non-healed and healed	>0.05	NA	Up to 12 w	Weekly up to 12 w	Assumed	8	% change from baseline: NR	% change from baseline: NR	NA
IL-13
IL-13	McQuilling 2021	WF	Multiplex MAP arrays	No difference non-healing vs. healing	>0.05	NA	12 w	1, 2, 3, 4, 12 w	No, repeated measurements	15	NR	NR	pg/mL
IL-13	Stacey 2019	WF	Multiplex assay	No difference non-healing vs. healing	0.2962	NA	Up to 13 w	Baseline and weekly up to 13 w	No, repeated measurements	24	19.0	49.7	Unknown, likely pg/mL
IL-13	Beidler 2009	Biopsy	Multiplex assay	No difference rapid vs. delayed healing before or after compression	>0.05	NA	4 w	Baseline and 4 w	No	29	NR	NR	pg/µg protein
IL-13	Hodde 2020	WF	Luminex	No difference from baseline between non-healed and healed	>0.05	NA	Up to 12 w	Weekly up to 12 w	Assumed	8	% change from baseline: NR	% change from baseline: NR	NA
IL-13	McQuilling 2021	WF	Multiplex MAP arrays	No correlation between cytokine levels and percentage wound size reduction	>0.05	NA	12 w	1, 2, 3, 4, 12 w	No, repeated measurements	15	NA	NA	pg/mL, but correlation
IL-13	Beidler 2009	Biopsy	Multiplex assay	No difference before vs. after compression	>0.05	NA	4 w	Baseline and 4 w	Yes	29	Before compression 0.05	After compression 0.04	pg/µg protein
IL-13	Ligi 2016	WF	Luminex	No difference inflammatory vs. granulating	>0.05	NA	NR, during hospitalization	Baseline, some had two measurements	No, repeated measurements	34	5.7	6.2	pg/mL
IL-15
IL-15	Stacey 2019	WF	Multiplex assay	No difference healing vs. non-healing	0.1984	NA	Up to 13 w	Baseline and weekly up to 13 w	No, repeated measurements	24	3.97	0.007	Unknown, likely pg/mL
IL-15	McQuilling 2021	WF	Multiplex MAP arrays	No difference between healing vs. non-healing	>0.05	NA	12 w	1, 2, 3, 4, 12 w	No, repeated measurements	15	NR	NR	pg/mL
IL-15	McQuilling 2021	WF	Multiplex MAP arrays	No correlation between cytokine levels and percentage wound size reduction	>0.05	NA	12 w	1, 2, 3, 4, 12 w	No, repeated measurements	15	NA	NA	pg/mL, but correlation
IL-15	Ligi 2016	WF	Luminex	No difference inflammatory vs. granulating	>0.05	NA	NR, during hospitalization	Baseline, some had two measurements	No, repeated measurements	34	31.1	27.5	pg/mL
IL16
IL-16	Stacey 2019	WF	Multiplex assay	Univariate analysis: Elevated in nonhealing Multivariate: No difference healing vs. nonhealing	0.0038**	2.3	Up to 13 w	Baseline and weekly up to 13 w	No, repeated measurements	24	2274.6	5155.6	Unknown, likely pg/mL
IL17
IL-17	Stacey 2019	WF	Multiplex assay	No difference non-healing vs. healing	0.7698	NA	Up to 13 w	Baseline and weekly up to 13 w	No, repeated measurements	24	150.8	139.8	Unknown, likely pg/mL
IL-17	McQuilling 2021	WF	Multiplex MAP arrays	No difference non-healing vs. healing	>0.05	NA	12 w	1, 2, 3, 4, 12 w	No, repeated measurements	15	NR	NR	pg/mL
IL-17	Ligi 2016	WF	Luminex	No difference inflammatory vs. granulating	>0.05	NA	NR, during hospitalization	Baseline, some had two measurements	No, repeated measurements	34	112.2	94.8	pg/mL
IL-17	McQuilling 2021	WF	Multiplex MAP arrays	No correlation between cytokine levels and percentage wound size reduction	>0.05	NA	12 w	1, 2, 3, 4, 12 w	No, repeated measurements	15	NA	NA	pg/mL, but correlation
TNF-𝜶
TNF-𝜶	Trengove 2000	WF	ELISA	Elevated in non-healing vs. healing	0.013	2.9	2 w	Baseline and 2 w	Yes	14	Median 1639	Median 4734	pg/mL
TNF-𝜶	Wallace 1998	WF	ELISA Medgenix ELISA Genzyme	Elevated in non-healing vs. healing	Medigenix <0.002 Genzyme <0.003	Medigenix 2.7 Genzyme 3.6	2 w	Baseline and 2 w	Yes	21	Medigenix Median 895.2 Genzyme Median 190.8	Medigenix Median 2428.5 Genzyme Median 694.7	pg/mL
TNF-𝜶	Tian 2003	Biopsy, keratinocytes, intact skin	IHC	Elevated in non-healing vs. healing	<0.01	NA	2 w	Baseline and 2 w	Yes	12	NA	NA	Grading of staining: negative, weak, moderate, intense
TNF-𝜶	Murphy 2002	Serum leg	ELISA	Elevated in non-healing vs. healing (reduced with compression)	<0.01	2.2	12 w	Baseline and 4-6 w	Yes	8	Median 9	Median 20	pg/mL
TNF-𝜶	Hodde 2020	WF	Luminex	Reduction from baseline in wounds in healed vs. non-healed	<0.05	NA	Up to 12 w	Weekly up to 12 w	Assumed	8	% change from baseline: 75%	% change from baseline: 180.8%	NA
TNF-𝜶	Escandon 2012	Biopsy	RT-PCR	Negative correlation between cytokine change and healing	0.0395	Corr -0.96	4 w	Baseline and 4 w	NR but assumed	7	NA	NA	NA
TNF-𝜶	Beidler 2009	Biopsy	Multiplex assay	Elevated before vs. after compression	0.05	2.0	4 w	Baseline and 4 w	Yes	29	Before compression 0.02	After compression 0.01	pg/µg protein
TNF-𝜶	McQuilling 2021	WF	Multiplex MAP arrays	No difference non-healing vs. healing	>0.05	NA	12 w	1, 2, 3, 4, 12 w	No, repeated measurements	15	NR	NR	pg/mL
TNF-𝜶	Stacey 2019	WF	Multiplex assay	No difference non-healing vs. healing	0.3704	NA	Up to 13 w	Baseline and weekly up to 13 w	No, repeated measurements	24	1431.3	2071.2	Unknown, likely pg/mL
TNF-𝜶	Ligi 2016	WF	Luminex	No difference inflammatory vs. granulating	>0.05	NA	NR, during hospitalization	Baseline, some had two measurements	No, but some had two measurements	34	57.5	100.6	pg/mL
TNF-𝜶	Tian 2003	Biopsy, keratinocytes, ulcer edge	IHC	No difference in non-healing vs. healing	NS	NA	2 w	Baseline and 2 w	Yes	12	NA	NA	Grading of staining: negative, weak, moderate, intense
TNF-𝜶	Filkor 2016	PBMC (blood)	QRT-PCR	No difference non-healing vs. healing	0.757	NA	4 w	Unclear	No	69	Fold over healthy control: 120	Fold over healthy control: 225	Fold over healthy control
TNF-𝜶	Beidler 2009	Biopsy	Multiplex assay	No difference rapid vs. delayed healing before or after compression	>0.05	NA	4 w	Baseline	No	29	NR	NR	pg/µg protein
TNF-𝜶	McQuilling 2021	WF	Multiplex MAP arrays	No correlation between cytokine levels and percentage wound size reduction	>0.05	NA	12 w	1, 2, 3, 4, 12 w	No, repeated measurements	15	NA	NA	pg/mL, but correlation
TNF-𝜶	Sadler 2012	WF	ELISA	No association to reduction in ulcer size	>0.05	NA	4 w	4 w	No	18	NR	NR	pg/mg
TNF-𝜶	Gohel 2008	WF	Sandwich ELISA	No correlation between cytokine change and ulcer size change	0.713	Corr -0.100	5 w	Baseline and 5 w	No	34	NR	NR	pg/mL but correlation
TNF-𝜶	Gohel 2008	WF	Sandwich ELISA	No correlation between concentration at baseline and subsequent healing	NS	NA	5 w	Baseline	No	34	NR	NR	pg/mL but correlation
TNF-𝜶	He 1997	Serum leg and arm	Sandwhich enzyme immunoassay	No association between baseline levels or changes in their concentration with healing	>0.05	NA	Assumed 3.5 h	Baseline, 10, 30, 60 and 120 min	Yes	10	NR	NR	pg/mL
TNF-𝜶	Trengove 2000	WF	ELISA	No relationship between the change in ulcer size and the levels	NS	NA	2 w	Baseline and 2 w	Yes	14	NA	NA	pg/mL
TNF-𝜶	Grandi 2018	Biopsy, mastcells, unclear if the whole tissue was investigated	IHC	No correlation with the reduction of wound's mean volume	NS	NR	Unclear, around 3 w	Baseline (before application of ALA 20% gel) and repeated after 1 h after irradiation	Yes	19	NR	NR	NR
TNF-𝜶	Gohel 2008	Serum	Sandwich ELISA	No detection in serum	NA	NA	5 w	Baseline and 5 w	NA	34	NR	NR	pg/mL but correlation
TNF (not stated if TNF-𝜶)	Krejner 2017	Serum	ELISA	No difference among healing groups (poor, moderate, good, or fast healer)*	NS**	NA	No follow-up	NR, baseline assumed	No	19	NR	NR	pg/mL
TNF-𝜶 bio	Wallace 1998	WF	Bioassay	No difference non-healing vs. healing	NS	NA	2 w	Baseline and 2 w	Yes	21	Median 49	Median 156.1	U/mL
TNF-RI	Tian 2003	Biopsy, keratinocytes, intact skin	IHC	Elevated in non-healing vs. healing	<0.01	NA	2 w	Baseline and 2 w	Yes	12	NA	NA	Grading of staining: negative, weak, moderate, intense
TNF-RII	Wallace 1998	WF	ELISA	Elevated in non-healing vs. healing	<0.025	NA**	2 w	Baseline and 2 w	Yes	21	Median 20616	Median b26897**	pg/mL
TNF-RI	Wallace 1998	WF	ELISA	No difference non-healing vs. healing	"NS"	NA	2 w	Baseline and 2 w	Yes	21	Median 13930.5	Median 14858.5	pg/mL
TNF-RI	Stacey 2019	WF	Multiplex assay	No difference non-healing vs. healing	0.7319	NA	Up to 13 w	Baseline and weekly up to 13 w	No, repeated measurements	24	4219.4	4368.4	Unknown, likely pg/mL
TNF-RI	Tian 2003	Biopsy, keratinocytes, ulcer edge	IHC	No difference in non-healing vs. healing	NS	NA	2 w	Baseline and 2 w	Yes	12	NA	NA	Grading of staining: negative, weak, moderate, intense
TNF-RII	Tian 2003	Biopsy, keratinocytes, ulcer edge	IHC	No staining	NA	NA	2 w	Baseline and 2 w	Yes	Unk. ≤21	NA	NA	Grading of staining: negative, weak, moderate, intense
TNF-RII	Stacey 2019	WF	Multiplex assay	No difference non-healing vs. healing	0.2003	NA	Up to 13 w	Baseline and weekly up to 13 w	No, repeated measurements	24	8161.7	7205.7	Unknown, likely pg/mL
TNF-𝜷
TNF-𝜷	McQuilling 2021	WF	Multiplex MAP arrays	Elevated in non-healing vs. healing	0.0005	1.4	12 w	1, 2, 3, 4, 12 w	No, repeated measurements	15	2.2	3.1	pg/mL
TNF-𝜷	Stacey 2019	WF	Multiplex assay	No difference non-healing vs. healing	0.3253	NA	Up to 13 w	Baseline and weekly up to 13 w	No, repeated measurements	24	0.02	0	Unknown, likely pg/mL
TNF-𝜷	McQuilling 2021	WF	Multiplex MAP arrays	No correlation between cytokine levels and percentage wound size reduction	>0.05	NA	12 w	1, 2, 3, 4, 12 w	No, repeated measurements	15	NA	NA	pg/mL, but correlation
VEGF
VEGF	Murphy 2002	Serum leg	ELISA	Elevated in non-healing vs. healing (reduced with compression)	<0.01	2.7	12 w	Baseline and 4-6 w	Yes	8	Median 70	Median 190	pg/mL
VEGF	Serra 2013	Plasma	ELISA	Elevated levels in slow-healing vs. high-healing	<0.01	NA	Median time: 13 mo	Baseline, w 4, 3 mo and 5 mo	Unclear, repeated measurements	28	Baseline: 590 5 mo: 100	Baseline: 600 5 mo: 310	pg/mL
VEGF	Serra 2013	WF	ELISA	Elevated levels in slow-healing vs. high-healing	<0.01	NA	Median time: 13 mo	Baseline, w 4, 3 mo and 5 mo	Unclear, repeated measurements	28	Baseline: 620 5 mo: 110	Baseline: 690 5 mo: 430	pg/mL
VEGF	Serra 2015	Plasma	ELISA	Elevated levels in slow-healing vs. high-healing	<0.01	NA	Median time: 13 mo	Baseline, w 4, 3 mo and 5 mo	Unclear, repeated measurements	32	Baseline: 560 5 mo: 105	Baseline: 590 5 mo: 310	pg/mL
VEGF	Serra 2015	WF	ELISA	Elevated levels in slow-healing vs. high-healing	<0.01	NA	Median time: 13 mo	Baseline, w 4, 3 mo and 5 mo	Unclear, repeated measurements	32	Baseline: 610 5 mo: 110	Baseline: 650 5 mo: 350	pg/mL
VEGF-165	Drinkwater 2003	WF	ELISA	Elevated in non-healers vs. healers	<0.05	2.1	At least 1 year, or until healed	NR, baseline assumed	No	32	32.19	67.17	ng/mg protein
VEGF	Tian 2003	Biopsy, keratinocytes, ulcer edge and intact skin	IHC	Elevated in non-healing vs. healing	<0.01	NA	2 w	Baseline and 2 w	Yes	13	NA	NA	Grading of staining: negative, weak, moderate, intense
VEGF	Ligi 2016	WF	Luminex	Elevated in inflammatory vs. granulating	0.0004	2.6	NR, during hospitalization	Baseline, some had two measurements	No, repeated measurements	34	522.9	1362	pg/mL
VEGF	Escandon 2012	Biopsy	RT-PCR	Negative correlation between cytokine change and healing (trend)	0.0660	Corr -0.78	4 w	Baseline and 4 w	NR but assumed	7	NA	NA	NA
VEGF	McQuilling 2021	WF	Multiplex MAP arrays	No difference non-healing vs. healing	>0.05	NA	12 w	1, 2, 3, 4, 12 w	No, repeated measurements	15	NR	NR	pg/mL
VEGF-165	Drinkwater 2003	Biopsy	ELISA	No difference non-healing vs. healing	NS	NA	At least 1 year, or until healed	NR, baseline assumed	No	30	2.36	2.12	ng/mg protein
VEGF	McQuilling 2021	WF	Multiplex MAP arrays	No correlation between cytokine levels and percentage wound size reduction	>0.05	NA	12 w	1, 2, 3, 4, 12 w	No, repeated measurements	15	NA	NA	pg/mL, but correlation
VEGF	Senet 2003	WF	ELISA	No difference non-healing vs. healing at the end of the study	>0.05	NA	16 w	12 w	Uncertain, likely not	15	NR	NR	ng/mg total protein
VEGF	Gohel 2008	WF	Sandwich ELISA	No correlation between cytokine change and ulcer size change	0.565	Corr -0.146	5 w	Baseline and 5 w	Yes	34	NR	NR	pg/mL but correlation
VEGF	Gohel 2008	WF	Sandwich ELISA	No correlation between concentration at baseline and subsequent healing	NS	NA	5 w	Baseline	No	34	NR	NR	pg/mL but correlation
VEGF	Gohel 2008	Serum	Sandwich ELISA	No correlation between cytokine change and ulcer size change	0.304	Corr -0.1331	5 w	Baseline and 5 w	Yes	34	NR	NR	pg/mL but correlation
VEGF-R1	Drinkwater 2003	WF	ELISA	No difference non-healing vs. healing	NS	NA	At least 1 year, or until healed	NR, baseline assumed	No	32	7.18	7.02	ng/mg protein
TGF
TGF-𝜷1	Tian 2003	Biopsy, keratinocytes, intact skin	IHC	Elevated in nonhealing vs. healing	<0.01	NA	2 w	Baseline and 2 w	Yes	14	NA	NA	Grading of staining: negative, weak, moderate, intense
TGF-𝜷1	Hodde 2020	WF	ELISA	Elevation from baseline in wounds in healed vs. non-healed	<0.05	NA	Up to 12 w	Weekly up to 12 w	Assumed	8	% change from baseline: 122.1%	% change from baseline: 71.2%	NA
TGF-𝜷1	Gohel 2008	WF	Sandwich ELISA	Positive correlation between cytokine change and ulcer size change (healing)	0.032	Corr -0.645	5 w	Baseline and 5 w	Yes	34	NR	NR	pg/mL but correlation
TGF-𝜷	Grandi 2018	Biopsy	IHC	Increase in cytokine correlated with the reduction of wounds' mean volume	Signficant	NR	Unclear, around 3 w	Baseline (before application of ALA 20% gel) and repeated after 1 h after irradiation	Yes	6	NR	NR	NR
TGF-𝜷1	Lagattolla 1995	Biopsy, ulcer edge	ELISA	Increased levels correlated to rapid healing (trend) (Negative correlation with time to healing)	0.065	Corr - 0.6	6 mo	Baseline	No	10	NA	NA	log TGF-𝜷1
TGF-𝜷1	Beidler 2009	Biopsy	Multiplex assay	Elevated after vs. before compression	0.031	1.4	4 w	Baseline and 4 w	Yes	10	Before compression 0.24	0.34	pg/µg protein
TGF-𝜷1	Trengove 2000	WF	ELISA	No difference non-healing vs. healing	0.13	NA	2 w	Baseline and 2 w	Yes	14	Median 12.4	Median 9.2	ng/mL
TGF-𝜷1	McQuilling 2021	WF	Multiplex MAP arrays	No difference non-healing vs. healing	>0.05	NA	12 w	1, 2, 3, 4, 12 w	No, repeated measurements	15	NR	NR	pg/mL
TGF-𝜷1	Tian 2003	Biopsy, keratinocytes, ulcer edge	IHC	No difference in non-healing vs. healing	NS	NA	2 w	Baseline and 2 w	Yes	14	NA	NA	Grading of staining: negative, weak, moderate, intense
TGF-𝜷1	McQuilling 2021	WF	Multiplex MAP arrays	No correlation between cytokine levels and percentage wound size reduction	>0.05	NA	12 w	1, 2, 3, 4, 12 w	No, repeated measurements	15	NA	NA	pg/mL, but correlation
TGF-𝜷1	Gohel 2008	WF	Sandwich ELISA	No correlation between concentration at baseline and subsequent healing	NS	NA	5 w	Baseline	No	34	NR	NR	pg/mL but correlation
TGF-𝜷	Wiegand 2017	WF	IHC	No correlation to reduction of wound size (prediction of healing)	>0.05	NA	4 w	Baseline, 2	Unclear	36	NA	NA	Percentage weighted DAB-value
TGF-𝜷1	Ligi 2017	WF	Luminex	No difference inflammatory vs. granulating	0.947	NA	NR, during hospitalization	Baseline	No, some had two measurements	30	Median 2400	Median 2400	pg/mL
TGF-𝜷2	Ligi 2017	WF	Luminex	No difference inflammatory vs. granulating	0.301	NA	NR, during hospitalization	Baseline	No, but some had two measurements	30	Median 70	Median 95	pg/mL
TGF-𝜷2	McQuilling 2021	WF	Multiplex MAP arrays	No difference non-healing vs. healing	>0.05	NA	12 w	1, 2, 3, 4, 12 w	No, repeated measurements	15	NR	NR	pg/mL
TGF-𝜷2	McQuilling 2021	WF	Multiplex MAP arrays	No correlation between cytokine levels and percentage wound size reduction	>0.05	NA	12 w	1, 2, 3, 4, 12 w	No, repeated measurements	15	NA	NA	pg/mL, but correlation
TGF-𝜷3	Ligi 2017	WF	Luminex	Elevated in inflammatory vs. granulating	0.033	Based on mean: 2.2	NR, during hospitalization	Baseline	No, but some had two measurements	30	9.10 Median 7	20.25 Median 19	pg/mL
TGF-𝜷3	McQuilling 2021	WF	Multiplex MAP arrays	No difference non-healing vs. healing	>0.05	NA	12 w	1, 2, 3, 4, 12 w	No, repeated measurements	15	NR	NR	pg/mL
TGF-𝜷3	McQuilling 2021	WF	Multiplex MAP arrays	No correlation between cytokine levels and percentage wound size reduction	>0.05	NA	12 w	1, 2, 3, 4, 12 w	No, repeated measurements	15	NA	NA	pg/mL, but correlation
PDGF
PDGF	Trengove 2000	WF	ELISA	No difference non-healing vs. healing	0.13	NA	2 w	Baseline and 2 w	Yes	14	Median 133	Median 97	pg/mL
PDGF	Lagattolla 1995	Biopsy	ELISA	No correlation to time to healing	NS**	NA	6 mo	Baseline	No	10	NA	NA	NR
PDGF	Trengove 2000	WF	ELISA	No relationship between the change in ulcer size and the levels	NS	NA	2 w	Baseline and 2 w	Yes	14	NA	NA	pg/mL
PDGF-AA	Mwaura 2006	WF	ELISA	Elevated in healing vs. non-healing	<0.021	1.2 in healing	8 w	Baseline	No	40	102 Median 98	88 Median 90	pg/mL
PDGF-AA	Mwaura 2006	Biopsy, ulcer base	IHC	Elevated in healing vs. non-healing	<0.0001	NA	8 w	Baseline	No	38	NA	NA	Semi-quant. Non-healing: 2 positive, 18 negative. Healing: 17 positive, 1 negative
PDGF-A	Tian 2003	Biopsy, keratinocytes, intact skin and ulcer edge	IHC	Elevated in non-healing vs. healing	Intact: 0.001 Edge: <0.05	NA	2 w	Baseline and 2 w	Yes	17	NA	NA	Grading of staining: negative, weak, moderate, intense
PDGF-AA	McQuilling 2021	WF	Multiplex MAP arrays	No difference non-healing vs. healing	>0.05	NA	12 w	1, 2, 3, 4, 12 w	No, repeated measurements	15	NR	NR	pg/mL
PDGF-AA	McQuilling 2021	WF	Multiplex MAP arrays	No correlation between cytokine levels and percentage wound size reduction	>0.05	NA	12 w	1, 2, 3, 4, 12 w	No, repeated measurements	15	NA	NA	pg/mL, but correlation
PDGF-AB	Harris 1995	WF	ELISA	No difference non-healing vs. healing	> 0.05	NA	No follow-up	Baseline	No	18	2200 pg/mL 0.11 pg/µg albumin	1960 pg/mL 0.15 pg/µg albumin	pg/mL pg/µg albumin
PDGF-BB	Stacey 2019	WF	Multiplex assay	Elevated in healing (univariate analysis**) No difference non-healing vs. healing (multivariate analysis)	0.0109**	2.5	Up to 13 w	Baseline and weekly up to 13 w	No, repeated measurements	24	21.2	8.5	Unknown, likely pg/mL
PDGF-BB	Ligi 2016	WF	Luminex	Elevated in granulating vs. inflammatory	0.0063	2.6	NR, during hospitalization	Baseline, some had two measurements	No, repeated measurements	34	70.3	27.5	pg/mL
PDGF-BB	McQuilling 2021	WF	Multiplex MAP arrays	No difference non-healing vs. healing	>0.05	NA	12 w	1, 2, 3, 4, 12 w	No	15	NR	NR	pg/mL
PDGF-BB	McQuilling 2021	WF	Multiplex MAP arrays	No correlation between cytokine levels and percentage wound size reduction	>0.05	NA	12 w	1, 2, 3, 4, 12 w	No, repeated measurements	15	NA	NA	pg/mL, but correlation
PDGF receptor, alpha polypeptide	Charles 2008	Biopsy, ulcer bed	High throughout cDNA microarray analysis	Upregulated genes in non-healing vs. healing	0.0216	Raw fold change 3.36	NA	Baseline	No	10	NR	NR	Signal intensity
GM-CSF
GM-CSF	Stacey 2019	WF	Multiplex assay	Univariate analysis: Elevated in non-healing Multivariate: Elevated in non-healing. OR 126.5, 95% CI 10.84-1475.83. GM-CSF predicts non-healing. Primary analysis: ROC 0.92, 95% CI 0.85-1.00. Highest Youden's J statistics 29.5 pg/mL. Sensitivity 96%. Specificity 61% Secondary analysis (incl. VLU first classified as indeterminate): ROC 0.66, 95% CI 0.56-0.77. Sensitivity 81.1%. Specificity 48.1%.	0.0001**	4.2	Up to 13 w	Baseline and weekly up to 13 w	No, repeated measurements	24	45.1	187.2	Unknown, likely pg/mL
GM-CSF	Beidler 2009	Biopsy	Multiplex assay	Elevated in rapid healers before compression	0.02	2.8	4 w	Baseline	No	29	0.11	0.04	pg/µg protein
GM-CSF	Ligi 2016	WF	Luminex	Elevated in inflammatory vs. granulating	<0.0001	1.7	NR, during hospitalization	Baseline, some had two measurements	No, repeated measurements	34	90.5	154.0	pg/mL
GM-CSF	Beidler 2009	Biopsy	Multiplex assay	Elevated before vs. after compression	0.001	3.5	4 w	Baseline and 4 w	Yes	29	Before compression 0.07	After compression 0.02	pg/µg protein
GM-CSF	Harris 1995	WF	ELISA	No difference non-healing vs. healing	>0.05	NA	No follow-up	Baseline	No	18	1880 pg/mL 0.11 pg/µg albumin	3361 pg/mL 0.26 pg/µg albumin	pg/mL pg/µg albumin
GM-CSF	McQuilling 2021	WF	Multiplex MAP arrays	No difference non-healing vs. healing	>0.05	NA	12 w	1, 2, 3, 4, 12 w	No, repeated measurements	15	NR	NR	pg/mL
GM-CSF	Beidler 2009	Biopsy	Multiplex assay	No difference rapid vs. delayed healing after compression	>0.05	NA	4 w	4 w	No	29	0.02	0.025	pg/µg protein
GM-CSF	Hodde 2020	WF	Luminex	No difference from baseline between non-healed and healed	>0.05	NA	Up to 12 w	Weekly up to 12 w	Assumed	8	% change from baseline: NR	% change from baseline: NR	NA
GM-CSF	McQuilling 2021	WF	Multiplex MAP arrays	No correlation between cytokine levels and percentage wound size reduction	>0.05	NA	12 w	1, 2, 3, 4, 12 w	No, repeated measurements	15	NA	NA	pg/mL, but correlation
G-CSF
G-CSF	Beidler 2009	Biopsy	Multiplex assay	Elevated before vs. after compression	0.04	1.9	4 w	Baseline and 4 w	Yes	29	Before compression 0.27	After compression 0.14	pg/µg protein
G-CSF	Stacey 2019	WF	Multiplex assay	No difference non-healing vs. healing	0.5155	NA	Up to 13 w	Baseline and weekly up to 13 w	No, repeated measurements	24	2999.6	3168.7	Unknown, likely pg/mL
G-CSF	McQuilling 2021	WF	Multiplex MAP arrays	No difference non-healing vs. healing	>0.05	NA	12 w	1, 2, 3, 4, 12 w	No, repeated measurements	15	NR	NR	pg/mL
G-CSF	Beidler 2009	Biopsy	Multiplex assay	No difference rapid vs. delayed healing before or after compression	>0.05	NA	4 w	Baseline and 4 w	No	29	NR	NR	pg/µg protein
G-CSF	McQuilling 2021	WF	Multiplex MAP arrays	No correlation between cytokine levels and percentage wound size reduction	>0.05	NA	12 w	1, 2, 3, 4, 12 w	No, repeated measurements	15	NA	NA	pg/mL, but correlation
G-CSF	Ligi 2016	WF	Luminex	No difference inflammatory vs. granulating	>0.05	NA	NR, during hospitalization	Baseline, some had two measurements	No, repeated measurements	34	3195	3592	pg/mL
EGF
HB-EGF	Charles 2008	Biopsy, ulcer bed	High throughout cDNA microarray analysis	Downregulated genes in non-healing vs. healing	0.0240	Raw fold change -2.40	NA	Baseline	No	10	NR	NR	Signal intensity
EGF	Tian 2003	Biopsy, keratinocytes, intact skin	IHC	Elevated in non-healing vs. healing	<0.05	NA	2 w	Baseline and 2 w	Yes	18	NA	NA	Grading of staining: negative, weak, moderate, intense
EGF	McQuilling 2021	WF	Multiplex MAP arrays	Positive correlation between increased cytokine levels and percentage size reduction	<0.05	Corr R2 0.0329	12 w	1, 2, 3, 4, 12 w	No, repeated measurements	15	NA	NA	pg/mL, but correlation
EGF	Trengove 2000	WF	ELISA	No difference non-healing vs. healing	0.33	NA	2 w	Baseline and 2 w	Yes	14	Median 20	Median 10	pg/mL
EGF	McQuilling 2021	WF	Multiplex MAP arrays	No difference non-healing vs. healing	>0.05	NA	12 w	1, 2, 3, 4, 12 w	No, repeated measurements	15	NR	NR	pg/mL
EGF	Tian 2003	Biopsy, keratinocytes, ulcer edge	IHC	No difference in non-healing vs. healing	NS	NA	2 w	Baseline and 2 w	Yes	18	NA	NA	Grading of staining: negative, weak, moderate, intense
EGF	Trengove 2000	WF	ELISA	No relationship between the change in ulcer size and the levels	NS	NA	2 w	Baseline and 2 w	Yes	14	NA	NA	pg/mL
S100A8/A9
S100 calcium-binding A7	Charles 2008	Biopsy, ulcer edge	High throughout cDNA microarray analysis	Downregulated genes in non-healing vs. healing	0.0017	Raw fold change -120.44	NA	Baseline	No	10	NR	NR	Signal intensity
FGF
FGF-2	Lagattolla 1995	Biopsy, ulcer edge	ELISA	Elevated in healed vs. non-healed	0.036	2.0	6 mo	Baseline	No	19	Median 34.2	Median 17.1	pg/mL
FGF-2	Tian 2003	Biopsy, keratinocytes, intact skin	IHC	Elevated in non-healing vs. healing	<0.05	NA	2 w	Baseline and 2 w	Yes	18	NA	NA	Grading of staining: negative, weak, moderate, intense
FGF-2	Lagattolla 1995	Biopsy, ulcer base	ELISA	Elevated in healed vs. non-healed (trend)	0.069	NA	6 mo	Baseline	No	19	Median 56.2	Median 42.2	pg/mL
FGF-2	Trengove 2000	WF	ELISA	No difference non-healing vs. healing	0.86	NA	2 w	Baseline and 2 w	Yes	14	Median 261	Median 411	pg/mL
FGF-2	Harris 1995	WF	ELISA	No difference non-healing vs. healing	>0.05	NA	No follow-up	Baseline	No	11	302 pg/mL 0.03 pg/µg albumin	372 pg/mL 0.03 pg/µg albumin	pg/mL pg/µg albumin
FGF-2	McQuilling 2021	WF	Multiplex MAP arrays	No difference non-healing vs. healing	>0.05	NA	12 w	1, 2, 3, 4, 12 w	No, repeated measurements	15	NR	NR	pg/mL
FGF-2	Tian 2003	Biopsy, keratinocytes, ulcer edge	IHC	No difference non-healing vs. healing	NS	NA	2 w	Baseline and 2 w	Yes	18	NA	NA	Grading of staining: negative, weak, moderate, intense
FGF-2	McQuilling 2021	WF	Multiplex MAP arrays	No correlation between cytokine levels and percentage wound size reduction	>0.05	NA	12 w	1, 2, 3, 4, 12 w	No, repeated measurements	15	NA	NA	pg/mL, but correlation
FGF-2	Gohel 2008	WF	Sandwich ELISA	No correlation between cytokine change and ulcer size change	0.726	Corr -0.127	5 w	Baseline and 5 w	Yes	34	NR	NR	pg/mL but correlation
FGF-2	Lagattolla 1995	Biopsy, ulcer edge and base respect.	ELISA	No correlation to time to healing	NS**	NA	6 mo	Baseline	No	10	NA	NA	log bFGF
FGF-2	Trengove 2000	WF	ELISA	No relationship between the change in ulcer size and the levels	NS	NA	2 w	Baseline and 2 w	Yes	14	NA	NA	pg/mL
FGF-2	Gohel 2008	WF	Sandwich ELISA	No correlation between concentration at baseline and subsequent healing	NS	NA	5 w	Baseline	No	34	NR	NR	pg/mL but correlation
FGF-2	Ligi 2016	WF	Luminex	No difference inflammatory vs. granulating	>0.05	NA	NR, during hospitalization	Baseline, some had two measurements	No, repeated measurements	34	368.7	222.3	pg/mL
FGF-2	Gohel 2008	Serum	Sandwich ELISA	No detection in serum	NA	NA	5 w	Baseline and 5 w	NA	34	NR	NR	pg/mL but correlation
IFN-𝛾
IFN-𝛾	Beidler 2009	Biopsy	Multiplex assay	Elevated in rapid healers before compression	0.001	3.5	4 w	Baseline	No	29	0.42	0.12	pg/µg protein
IFN-𝛾	Beidler 2009	Biopsy	Multiplex assay	Elevated before vs. after compression	0.006	1.9	4 w	Baseline and 4 w	Yes	29	Before compression 0.27	After compression 0.14	pg/µg protein
IFN-𝛾 ("TFN-g")	Stacey 2019	WF	Multiplex assay	No difference non-healing vs. healing	0.3411	NA	Up to 13 w	Baseline and weekly up to 13 w	No, repeated measurements	24	1.2	3.1	Unknown, likely pg/mL
IFN-𝛾	McQuilling 2021	WF	Multiplex MAP arrays	No difference non-healing vs. healing	>0.05	NA	12 w	1, 2, 3, 4, 12 w	No, repeated measurements	15	NR	NR	pg/mL
IFN-𝛾	Beidler 2009	Biopsy	Multiplex assay	No difference rapid vs. delayed healing after compression	>0.05	NA	4 w	4 w	No	29	0.18	0.08	pg/µg protein
IFN-𝛾	Hodde 2020	WF	Luminex	No difference from baseline between non-healed and healed	>0.05	NA	Up to 12 w	Weekly up to 12 w	Assumed	8	% change from baseline: NR	% change from baseline: NR	NA
IFN-𝛾	McQuilling 2021	WF	Multiplex MAP arrays	No correlation between cytokine levels and percentage wound size reduction	>0.05	NA	12 w	1, 2, 3, 4, 12 w	No, repeated measurements	15	NA	NA	pg/mL, but correlation
IFN-𝛾	Ligi 2016	WF	Luminex	No difference inflammatory vs. granulating	>0.05	NA	NR, during hospitalization	Baseline, some had two measurements	No, repeated measurements	34	78.3	105.8	pg/mL
OTHER CYTOKINES
M-CSF	Stacey 2019	WF	Multiplex assay	No difference non-healing vs. healing	0.8986	NA	Up to 13 w	Baseline and weekly up to 13 w	No, repeated measurements	24	22.2	23.5	Unknown, likely pg/mL
TGF-𝜶	McQuilling 2021	WF	Multiplex MAP arrays	No difference non-healing vs. healing	>0.05	NA	12 w	1, 2, 3, 4, 12 w	No, repeated measurements	15	NR	NR	pg/mL
TGF-𝜶	McQuilling 2021	WF	Multiplex MAP arrays	No correlation between cytokine levels and percentage wound size reduction	>0.05	NA	12 w	1, 2, 3, 4, 12 w	No, repeated measurements	15	NA	NA	pg/mL, but correlation
KGF	Senet 2003	WF	ELISA	No difference non-healing vs. healing at the end of the study	>0.05	NA	16 w	12 w	Uncertain, likely not	15	NR	NR	ng/mg total protein
